1

2

3

4 **Full title:** Natural variation in the regulation of neurodevelopmental genes  
5 modifies flight performance in *Drosophila*

6

7 Adam N. Spierer<sup>1\*</sup>, Jim A. Mossman<sup>1,2</sup>, Samuel Pattillo Smith<sup>1,2</sup>, Lorin Crawford<sup>2,3,4</sup>,  
8 Sohini Ramachandran<sup>1,2</sup>, David M. Rand<sup>1,2\*</sup>

9

10 <sup>1</sup> Department of Ecology and Evolutionary Biology, Brown University, Providence, RI, United States of  
11 America

12 <sup>2</sup> Center for Computational Molecular Biology, Brown University, Providence, RI, United States of  
13 America

14 <sup>3</sup> Department of Biostatistics, Brown University, Providence, RI, United States of America

15 <sup>4</sup> Center for Statistical Sciences, Brown University, Providence, RI, United States of America

16

17 \* Corresponding authors

18 Email: [Adam\\_Spierer@alumni.brown.edu](mailto:Adam_Spierer@alumni.brown.edu) (ANS)

19 Email: [David\\_Rand@brown.edu](mailto:David_Rand@brown.edu) (DMR)

## 20 **Abstract**

21 The winged insects of the order *Diptera* are colloquially named for their most  
22 recognizable phenotype: flight. These insects rely on flight for a number of important life  
23 history traits, like dispersal, foraging, and courtship. Despite the importance of flight,  
24 relatively little is known about the genetic architecture of variation for flight performance.  
25 Accordingly, we sought to uncover the genetic modifiers of flight using a measure of  
26 flies' reaction and response to an abrupt drop in a vertical flight column. We conducted  
27 an association study using 197 of the *Drosophila* Genetic Reference Panel (DGRP)  
28 lines, and identified a combination of additive and marginal variants, epistatic  
29 interactions, whole genes, and enrichment across interaction networks. We functionally  
30 validated 13 of these candidate genes' (*Adgf-A/Adgf-A2/CG32181*, *bru1*, *CadN*,  
31 *CG11073*, *CG15236*, *CG9766*, *CREG*, *Dscam4*, *form3*, *fry*, *Lasp/CG9692*, *Pde6*, *Snoo*)  
32 contribution to flight, two of which (*fry* and *Snoo*) also validate a whole gene analysis we  
33 introduce for the DGRP: PEGASUS\_*flies*. Overall, our results suggest modifiers of  
34 muscle and wing morphology, and peripheral and central nervous system assembly and  
35 function are all important for flight performance. Additionally, we identified *ppk23*, an  
36 Acid Sensing Ion Channel (ASIC) homolog, as an important hub for epistatic  
37 interactions. These results represent a snapshot of the genetic modifiers affecting drop-  
38 response flight performance in *Drosophila*, with implications for other insects. It also  
39 draws connections between genetic modifiers of performance and BMP signaling and  
40 ASICs as targets for treating neurodegeneration and neurodysfunction.

## 41 **Author summary**

42 Insect flight is a widely recognizable phenotype of winged insects, hence the name:  
43 flies. While fruit flies, or *Drosophila melanogaster*, are a genetically tractable model,  
44 flight performance is a highly integrative phenotype, making it challenging to  
45 comprehensively identify the genetic modifiers that contribute to its genetic architecture.  
46 Accordingly, we screened 197 *Drosophila* Genetic Reference Panel lines for their ability  
47 to react and respond to an abrupt drop. Using several computational tools, we  
48 successfully identified several additive, marginal, and epistatic variants, as well as  
49 whole genes and altered sub-networks of gene-gene and protein-protein interaction  
50 networks, demonstrating the benefits of using multiple methodologies to elucidate the  
51 genetic architecture of complex traits more generally. Many of these significant genes  
52 and variants mapped to regions of the genome that affect development of sensory and  
53 motor neurons, wing and muscle development, and regulation of transcription factors.  
54 We also introduce PEGASUS\_flies, a *Drosophila*-adapted version of the PEGASUS  
55 platform first used in human studies, to infer gene-level significance of association  
56 based on the distribution of individual variant  $P$ -values. Our results contribute to the  
57 debate over the relative importance of individual, additive factors and epistatic, or higher  
58 order, interactions, in the mapping of genotype to phenotype.

## 59 **Introduction**

60 Flight is one of the most distinguishing features of winged insects, especially the  
61 taxonomic order *Diptera*. Colloquially named “flies,” these insects rely on their  
62 namesake for many facets of their life history: dispersal, foraging, evasion, migration,  
63 and mate finding [1]. Because flight is central to flies’ life history, many of the most  
64 critical genes for flight are strongly conserved [2, 3].

65  
66 These “flight-critical” genes are necessary for flight, even as the structures and neural  
67 circuits they form are co-opted for other phenotypes, like courtship song and display [4,  
68 5]. For example, *Wingless* is an important developmental patterning gene necessary for  
69 wing formation [6] and *Act88F* is one of the main actin isoforms in the indirect flight  
70 muscles [7]. We will designate these types of genes that play outsized roles in enabling  
71 flight “flight critical” genes, since altering their sequence or expression profile is more  
72 likely to result in large flight performance deficits. On the other hand, we will designate  
73 “flight-important” genes as those with more modest effects on flight, since they are  
74 important but not critical. In an evolutionary context, purifying selection would act on  
75 flight-critical genes more strongly than flight-important genes, meaning flight-important  
76 genes can harbor natural variants that might otherwise vary the flight phenotype. These  
77 genes are found across systems, including metabolism [8], muscle function [9],  
78 neuronal function [10, 11], and anatomical development [12, 13]. Genes filling multiple  
79 roles across systems are pleiotropic, and those with sufficient natural variation are likely  
80 to contribute to complex traits and disease [14, 15]. These traits and diseases’  
81 independent, yet interconnected, genetic architecture make them inherently challenging

82 to study because they are comprised of several modifiers of small to moderate effect  
83 size [16-18].

84  
85 We can leverage natural variants in flight-important genes to uncover novel associations  
86 between genotype and phenotype that otherwise modify flight-critical genes' function,  
87 via Genome Wide Association Study (GWAS). The *Drosophila* Genetics Reference  
88 Panel [19, 20] (DGRP) is a common resource for performing this type of analysis. The  
89 DGRP is a panel of 205 genetically distinct *D. melanogaster* lines represents a  
90 snapshot of natural variation. Previous studies on complex and highly polygenic,  
91 quantitative traits identify several candidate loci contributing to insect- and *Drosophila*-  
92 specific traits [21-23], as well as traits affecting human health and disease [24-27].

93  
94 Accordingly, this study was designed to identify the genetic modifiers of flight  
95 performance and map the underlying genetic architecture. We screened males and  
96 females from 197 of the 205 DGRP lines and analyzed both sexes, as well as the  
97 average and difference between sexes. Traditional association studies focus on the  
98 contribution of additive and dominant variants, however, these fail to identify different  
99 types of modifiers with different effect sizes. Accordingly, we took several approaches to  
100 identify modifiers at the individual variant, whole gene, and network levels. Accordingly,  
101 we identified 180 additive variants, 70 marginal variants, 12161 unique epistatic  
102 interactions, and nine interaction sub-networks containing 539 genes contributing to  
103 flight performance. We also identified 72 whole genes using `PEGASUS_flies`, a novel  
104 modification of the human-based `PEGASUS` program [28] that we modified to work with

105 *Drosophila* and DGRP studies <[https://github.com/ramachandran-lab/PEGASUS\\_flies](https://github.com/ramachandran-lab/PEGASUS_flies)>

106 (File S4).

107

108 Taken together, our results strongly suggest variation in flight performance across  
109 natural populations is affected by cis- and trans-regulatory elements' role in modifying 1)  
110 development of wing morphology, indirect flight musculature, and sensory organs; and  
111 2) the connectivity between the peripheral and central nervous systems. These results  
112 are further supported by functional validations of 13 candidate genes, many with known  
113 roles in altering neurogenesis and development. Overall, our results suggest important  
114 roles for modifiers of BMP signaling in neurodevelopment and pickpocket 23 (ppk23)—a  
115 degenerin/epithelial sodium channels (DEG/ENaC) homologous in humans with Acid  
116 Sensing Ion Channels (ASIC)—in altering affecting flight performance. These findings  
117 address an underexplored body of literature [29-32] calling for genetic and  
118 pharmacological targets of BMP signaling genes and ASIC for treating neuroinjury and  
119 neurodegenerative diseases in humans.

## 120 **Results**

### 121 **Variation in flight performance across the DGRP**

122 Cohorts of approximately 100 flies from 197 lines of the DGRP (S1 Table) were tested  
123 for flight performance using a flight column [33] (Fig 1A). We confirmed the repeatability  
124 of our assay by retesting 12 lines of varied ability reared 10 generations apart. We  
125 observed very strong agreement between generations ( $r = 0.95$ ; S1 Fig), affirming a role  
126 for genetic, rather than environmental or experimental, variation in driving phenotypic  
127 variation. We recorded high-speed videos for a weak, intermediate, and strong  
128 genotype entering the flight column (Figs 1B-D; S1 File) and concluded this assay is  
129 best for studying the reaction and response to an abrupt drop. There was strong  
130 agreement between sex-pairs' mean landing height for each genotype ( $r = 0.75$ ; Fig  
131 1E), suggesting the genetic architecture is mostly shared between the sexes. As  
132 expected, there was a modest degree of sexual dimorphism in performance, with males  
133 outperforming females (male:  $0.80\text{m} \pm 0.06\text{ SD}$ ; female:  $0.73\text{m} \pm 0.07\text{ SD}$ ; Fig 1F; S2  
134 Table), though the broad sense heritability ( $H^2$ ) for each sex was nearly the same  
135 ( $H^2_{\text{Male}} = 13.5\%$ ;  $H^2_{\text{Female}} = 14.4\%$ ). In addition to males and females, we also  
136 investigated the phenotypic variation in the average (sex-average) and difference (sex-  
137 difference) between sexes (S2 Fig).

138

139 **Fig 1. DGRP lines show differences in flight performance across lines.** (A) Flight  
140 performance assay measures the average landing height of flies as they fall through a  
141 flight column. Vials of flies are sent down the top chute and abruptly stop at the bottom,  
142 ejecting flies into a meter-long column. Falling flies will instinctively right themselves and

143 fly to the periphery, doing so at different times depending on their performance ability.  
144 (B-D) Collapsed z-stacks of high-speed video frames from the top quarter of the flight  
145 column illustrate these performance differences in (B) weak, (C) intermediate, and (D)  
146 strong genotypes. (E) There is sexual dimorphism within genotypes (deviation of red  
147 dashed regression line from  $y = x$  solid gray line), though sexes are well correlated ( $r =$   
148  $0.75$ ,  $n = 197$ ). (F) Sexually dimorphic performances are also viewable in the distribution  
149 of performances for each male (cyan) and female (red) genotype pair (mean  $\pm$  S.E.M.).  
150 Sex-genotype pairs are sorted in order of increasing male mean landing height.  
151 Genotype performances for genotypes in B-D are indicated on the distribution with the  
152 corresponding color-coded asterisk (\*) above the respective genotype position.

153  
154 Before running the association analysis, we tested whether flight performance was a  
155 unique phenotype. We compared our phenotype scores for males and female against  
156 publically available phenotypes on the DGRP2 webserver. We found no significant  
157 regression between flight performance and any of the phenotypes in either sex after  
158 correcting for multiple testing ( $P \leq 1.85E-3$ ; S3 Table). This negative result suggests our  
159 measure of flight performance is a unique phenotype among those reported.

160  
161 **Association of additive SNPs with flight performance**  
162 We conducted a Genome Wide Association Study (GWAS) to identify genetic markers  
163 associated with flight performance. We performed an analysis with 1,901,174 common  
164 variants ( $MAF \geq 0.05$ ) on the additive genetic effects of four sex-based phenotypes:  
165 males, females, sex-average, and sex-difference. Some phenotypes covaried with the



166 presence of major inversions (S4 Table), so we analyzed association results using a  
167 mixed model (Fig 2A) to account for *Wolbachia* infection status, presence of inversions,  
168 and polygenic relatedness (S3 and S4 Figs). Annotations and unreferenced descriptors  
169 of genes' functions, expression profiles, and orthologs were gathered from  
170 autogenerated summaries on FlyBase [34, 35]. These summaries and descriptors were  
171 compiled from data supplied by the Gene Ontology Consortium [36, 37], the Berkeley  
172 *Drosophila* Genome Project [38], FlyAtlas [39], The Alliance of Genome Resources  
173 Consortium [40], modENCODE [34], PAINT[41], the DRSC Integrative Ortholog  
174 Prediction Tool (DIOPT) [42], and several transcriptomics and proteomic datasets [9,  
175 12, 39, 43-46].

176  
177 **Fig 2. Variation in flight performance associated with several additive variants,**  
178 **some of which were functionally validated.** (A) An additive screen for genetic  
179 variants identified several variants that exceeded the traditional DGRP ( $P \leq 1E-5$ )  
180 threshold (gray line). These points (red points) were spread throughout the genome on  
181 all but chromosome 4. Sex-average variants pictured, though other sex-based  
182 phenotypes had similar profiles. (B) Approximately half of all variants were shared with  
183 at least one other sex-based analysis, while the other half of all variants was exclusive  
184 to a single analysis. (C) Candidate genes were selected based on the genes that the  
185 most significant variants mapped to. Both sexes were tested for flight performance.  
186 Validated genes were determined if there was a significant difference between  
187 experimental lines homozygous for an insertional mutant in the candidate gene and  
188 their background control lines lacking the insertional mutant (red points, Mann-Whitney-

189 U test,  $P \leq 0.05$ ). Very significant candidate genes (*CadN*, *CG11073/flapper*, and  
 190 *Dscam4*) each had two independent validation lines.

191  
 192 We filtered additive variants with a strict Bonferroni threshold ( $P \leq 2.63E-8$ ). Taking a  
 193 MinSNP approach, which identifies significant genes if their lowest (most significant)  
 194 variant  $P$ -value crosses a threshold [28], we identified six unique variants, five of which  
 195 mapped to six genes (*CG15236*, *CG34215*, *Dscam4*, *Egfr*, *fd96Ca*, *Or85d*) (Table 1).  
 196 Variants mapping to *Egfr* and *fd96Ca* also contained known embryonic cis-regulatory  
 197 elements (transcription factor binding sites (TFBS) and a silencer) [47]. Of note,  
 198 *Dscam4* was deemed “damaged” in 38 of the lines tested [19]; however, the difference  
 199 between mean landing heights of the damaged vs. undamaged lines was less than 1  
 200 cm ( $P = 0.32$ , Welch’s T-test).

201

202

**Table 1. Six additive variants surpassed the Bonferroni significance threshold.**

| Variant         | MAF     | Annotation                                                     |                 |                                                                                                                                                                              |
|-----------------|---------|----------------------------------------------------------------|-----------------|------------------------------------------------------------------------------------------------------------------------------------------------------------------------------|
|                 |         | Gene (Dmel)                                                    | Gene (Hsap)     | Regulatory Region                                                                                                                                                            |
| 2R_17433667_SNP | 0.05128 | <i>Egfr</i> (intron)                                           | EGFR            | TFBS ( <i>bcd</i> , <i>da</i> , <i>dl</i> , <i>gt</i> , <i>hb</i> , <i>kni</i> , <i>Med</i> , <i>prd</i> , <i>sna</i> , <i>tl</i> , <i>twi</i> , <i>disco</i> , <i>Trl</i> ) |
| 2R_2718036_DEL  | 0.05641 | <i>CG15236</i> (intron)<br><i>CG34215</i> (downstream, 764 bp) | -<br>-          | -                                                                                                                                                                            |
| 3L_8237821_SNP  | 0.0829  | <i>Dscam4</i> (intron)                                         | DSCAM           | -                                                                                                                                                                            |
| 3R_20907854_SNP | 0.06557 | <i>fd96Ca</i> (upstream, 552bp)                                | FOXB1/<br>FOXB2 | TFBS ( <i>dl</i> )<br>Silencer ( <i>HDAC</i> )                                                                                                                               |
| 3R_4379159_SNP  | 0.05263 | <i>Or85d</i> (non-synonymous, C277Y)                           | -               | -                                                                                                                                                                            |
| 3R_9684126_SNP  | 0.1514  | -                                                              | -               | -                                                                                                                                                                            |

These variants represented all four sex-based phenotypes and were typically near the minor allele frequency (MAF) > 0.05 limit. All but one mapped to a gene in *Drosophila* (Dmel), and three had human orthologs (Hsap). Additionally, two SNPs mapped to embryonic transcription factor binding sites (TFBS) and a silencer region.

203

204 Using the traditional DGRP significance threshold ( $P \leq 1E-5$ ) [48], we identified 180  
205 variants across all four sex-based phenotypes (Fig 2B, S5 Fig, S5 Table). The individual  
206 additive variant with the largest effect size contributed 0.045 meters (or 0.97% of the  
207 sum of all significant variants) for males and 0.064 meters (1.1% of the sum of all  
208 significant variants) for females. For reference, the variant with the smallest significant  
209 effect size was 1.7E-4 meters (or 0.0036% of the sum of all significant variants) for  
210 males and 5.7E-3 meters (or 0.095% of the sum of all significant variants) for females.  
211 All but 19 variants mapped to intergenic or non-coding regions, which are generally  
212 indicative of cis-regulatory regions. Of the non-coding variants, 149 mapped to 136  
213 unique genes across the sex-based analyses (Table 2). These included development  
214 and function of the nervous system (*aru*, *CadN*, *ChAT*, *chinmo*, *chn*, *CNMaR*, *CSN6*,  
215 *DIP-delta*, *Dscam4*, *Egfr*, *fd96Ca*, *form3*, *fry*, *hll*, *htk*, *jeb*, *kek2*, *klg*, *klu*, *Mbs*, *Mmp2*,  
216 *nompC*, *Or46a*, *Or85d*, *Pdp1*, *Ptp10D*, *pyd*, *Rbp6*, *rut*, *Sdc*, *SK*, *SKIP*, *Spn*, *Snoo*, *Tmc*),  
217 neuromuscular junction (*fend*, *Gad1*, *Gao/Galphao*, *jeb*, *Sdc*, *Syt1*), muscle (*bru1*, *bves*,  
218 *CG17839*, *jeb*, *Lasp*, *Pdp1*, *rhea*), cuticle and wing morphogenesis (*CG15236*,  
219 *CG34220*, *CG43218*, *Egfr*, *frtz*, *fry*, *Tg*), endoplasmic reticulum (*CG33110*, *CG43783*,  
220 *tbc*, *Vti1b*) and Golgi body functions (*Gmap*, *Rab30*, *Vti1b*), and regulation of translation  
221 (*mip40*, *mxt*, *Rbm13*, *Wdr37*). Approximately half of all variants were present in two or  
222 three sex-based analyses, though the remainder were unique to one (Fig 2B). Several  
223 variants mapped to transcription factors (*Asciz*, *Camta*, *CG18011*, *chinmo*, *chn*, *Eip78C*,  
224 *fd96Ca*, *Pdp1*, *run*) broadly affecting development and neurogenesis [34, 35]. Despite  
225 the enrichment for several annotations, we failed to identify any significant gene

226 ontology (GO) categories using GOWinda [49], a GWAS-specific gene set enrichment  
 227 analysis.  
 228

| <b>Table 2. Aggregated gene and variant counts by sex-based phenotype for each analysis.</b>                                                                                                                                            |                                         |                                           |                                                 |               |
|-----------------------------------------------------------------------------------------------------------------------------------------------------------------------------------------------------------------------------------------|-----------------------------------------|-------------------------------------------|-------------------------------------------------|---------------|
| <b>Additive analysis</b>                                                                                                                                                                                                                |                                         |                                           |                                                 |               |
|                                                                                                                                                                                                                                         | Male                                    | Female                                    | Sex-Average                                     | Sex-Different |
| Bonferroni variants<br>( $P \leq 2.63 \cdot 10^{-8}$ )                                                                                                                                                                                  | 1                                       | 4                                         | 3                                               | 1             |
| Bonferroni MinSNP genes<br>( $P \leq 2.63 \cdot 10^{-8}$ )                                                                                                                                                                              | 1                                       | 4                                         | 3                                               | 2             |
| Conventional variants<br>( $P \leq 1.00 \cdot 10^{-5}$ )                                                                                                                                                                                | 68                                      | 85                                        | 85                                              | 16            |
| Conventional MinSNP genes<br>( $P \leq 1 \cdot 10^{-5}$ )                                                                                                                                                                               | 56                                      | 73                                        | 69                                              | 11            |
| <b>Marginal analysis</b>                                                                                                                                                                                                                |                                         |                                           |                                                 |               |
|                                                                                                                                                                                                                                         | Male                                    | Female                                    | Sex-Average                                     | Sex-Different |
| Bonferroni Variants<br>( $P \leq 2.56 \cdot 10^{-8}$ )                                                                                                                                                                                  | 7                                       | 13                                        | 62                                              | 0             |
| MinSNP Genes<br>( $P \leq 2.56 \cdot 10^{-8}$ )                                                                                                                                                                                         | 5                                       | 7                                         | 21                                              | 0             |
| <b>Epistatic analysis</b>                                                                                                                                                                                                               |                                         |                                           |                                                 |               |
|                                                                                                                                                                                                                                         | Male<br>( $P \leq 3.75 \cdot 10^{-9}$ ) | Female<br>( $P \leq 2.02 \cdot 10^{-9}$ ) | Sex-Average<br>( $P \leq 4.24 \cdot 10^{-10}$ ) | Sex-Different |
| Paired Primary Variants                                                                                                                                                                                                                 | 1                                       | 5                                         | 18                                              | 0             |
| Paired Primary Genes                                                                                                                                                                                                                    | 1                                       | 2                                         | 6                                               | 0             |
| Paired Secondary Variants                                                                                                                                                                                                               | 42                                      | 2188                                      | 6139                                            | 0             |
| Paired Secondary Genes                                                                                                                                                                                                                  | 28                                      | 1061                                      | 2419                                            | 0             |
| <b>Whole gene analysis</b>                                                                                                                                                                                                              |                                         |                                           |                                                 |               |
|                                                                                                                                                                                                                                         | Male                                    | Female                                    | Sex-Average                                     | Sex-Different |
| Bonferroni ( $P \leq 3.01 \cdot 10^{-6}$ )                                                                                                                                                                                              | 23                                      | 29                                        | 25                                              | 23            |
| <b>Network analysis</b>                                                                                                                                                                                                                 |                                         |                                           |                                                 |               |
|                                                                                                                                                                                                                                         | <b>All sex-based phenotypes</b>         |                                           |                                                 |               |
| Sub-Networks                                                                                                                                                                                                                            | 9                                       |                                           |                                                 |               |
| Each analysis identified different genetic modifiers (variants, genes, networks). For each analysis, the different variant-, gene-, and network-based analyses identified separate genetic features associated with flight performance. |                                         |                                           |                                                 |               |

229  
 230 **General development and neurodevelopmental genes validated to affect flight**  
 231 **performance**

232 We performed functional validations on a subset of the genes mapped from variants  
233 identified in the Bonferroni and sex-average analysis. We identified 21 unique candidate  
234 genes for which a *Minos* enhancer trap *Mi{ET1}* insertional mutation line [50] was  
235 publically available [51] (S1 Table; *Adgf-A/Adgf-A2/CG32181*, *bru1*, *CadN*, *CG11073*,  
236 *CG15236*, *CG9766*, *CREG*, *Dscam4*, *form3*, *fry*, *Lasp/CG9692*, *Pde6*, *Snoo*). Three  
237 additional stocks for *CadN*, *Dscam4*, and *CG11073* were also tested for their strength of  
238 association. Finally, an insertion line for *CREG* was also included as a negative control,  
239 since it was not significant in the additive or subsequent analyses.

240  
241 Candidate genes were functionally validated by comparing the distribution in mean  
242 landing heights of stocks homozygous for the insertion and their paired control  
243 counterpart (S6 Fig) using a Mann-Whitney-U test (Fig 2C; S6 Table). Several were  
244 involved in neurodevelopment (*CadN*, *CG9766*, *CG11073*, *CG15236*, *Dscam4*, *form3*,  
245 *fry*, and *Snoo*), muscle development (*bru1* and *Lasp*), and transcriptional regulation of  
246 gene expression (*Pde6* and *CREG*). Both *CG9766* and *CG11073* are unnamed  
247 candidate genes. In validating roles for both these genes, we are naming them *tumbler*  
248 (*tumbl*) and *flapper* (*flap*), respectively, based on the tumbling and flapping motions of  
249 weaker flies struggling to right themselves in the flight performance assay.

250

## 251 **Association of gene-level significance and interaction networks with flight** 252 **performance**

253 The minSNP approach on the additive variants prioritizes the identification of genes  
254 containing variants with larger effects [28]. However, this approach ignores linkage

255 blocks and gene length, which can bias results. It is important to account for gene  
256 length because many neurodevelopmental genes can be lengthy and exceed 100kb  
257 (*CadN*, 131kb). One alternative approach is Precise, Efficient Gene Association Score  
258 Using SNPs (PEGASUS), which assesses whole gene significance scores based on the  
259 distribution of a gene's variant *P*-value distributions with respect to a null chi-squared  
260 distribution [28]. This approach enriches for whole genes of moderate effect and  
261 enables the identification of genes that might go undetected in a minSNP approach.  
262  
263 While PEGASUS is configured for human populations, we developed PEGASUS\_flies,  
264 a modified version for *Drosophila* <[https://github.com/ramachandran-](https://github.com/ramachandran-lab/PEGASUS_flies)  
265 [lab/PEGASUS\\_flies](https://github.com/ramachandran-lab/PEGASUS_flies)>. This platform is configured to work with DGRP data sets, and can  
266 be customized to accept other *Drosophila*-based or model screening panels. From our  
267 additive variants, PEGASUS\_flies identified 72 unique genes across the all sex-based  
268 phenotypes, whose gene scores passed a Bonferroni threshold ( $P \leq 3.03E-6$ ; S7  
269 Table). These genes were present on five of the six chromosome arms tested (Fig 3A).  
270 They were generally different from those identified in the additive approach's minSNP  
271 analyses (Fig 3B, S7 Fig), though 15 overlapped (*CG17839*, *CG32506*, *CG33110*,  
272 *Gmap*, *Mbs*, *Pdp1*, *Rab30*, *VAcHT*, *aru*, *bves*, *fry*, *mip40*, *mxt*, *oys*, *sdk*). The relatively  
273 low overlap between these two gene sets is to be expected, since they prioritize  
274 variants of large effect vs. whole genes of moderate effect. Overall, genes annotations  
275 were enriched for neural development and function (*aru*, *bchs*, *CG13506*, *ChAT*, *Ccn*,  
276 *daw*, *dsf*, *Dip-δ*, *dpr6*, *fry*, *fz2*, *Mbs*, *Pdp1*, *sdk*), wing and development (*CycE*, *daw*, *dsx*,  
277 *egr*, *fry*, *fz2*, *Gart*, *HnRNP-K*, *Mbs*, *sno*), Rab GTPase activity (*ca*, *CG32506*, *Gmap*, *plx*,

278 *Rab30*), and regulators of transcription (*dsf*, *fry*, *HBS1*, *luna*, *MED23*, *mip40*, *Pdp1*,  
279 *Rab30*, *SAP130*, *Tgi*). Different sex-based phenotypes varied in how unique certain  
280 whole genes were to a given phenotype (Fig 3C). Genes identified in the sex-average  
281 analysis were generally shared with the male and female phenotypes, while genes in  
282 the sex-difference analysis were generally unique. Interestingly, *Ccn* was present in  
283 both the male and sex-difference, and *dsf* and *sdk* were both present in the sex-average  
284 and sex-difference.

285

286 **Fig 3. PEGASUS\_flies identifies different genetic modifiers than the additive**  
287 **screen.** (A) PEGASUS\_flies results plotted as a Manhattan plot. For the sex-average  
288 phenotype, several genes (red points, labeled with gene symbol) exceed a strict  
289 Bonferroni significance threshold (gray dashed line,  $P \leq 3.43E-6$ ) identified several  
290 genes. (B) PEGASUS\_flies prioritizes genetic modifiers of moderate effect, taking into  
291 account linkage blocks and gene length. Significant PEGASUS\_flies (red) compared  
292 against genes significant under a minSNP approach for additive variants (blue) have  
293 very little overlap between the two sets (purple). (C) Many of the genes  
294 PEGASUS\_flies identifies are unique to a sex-based phenotype, though the sex-  
295 average genes were generally found in other analyses.

296

297 Taking advantage of the gene-level significance scores, we leveraged publicly available  
298 gene-gene and protein-protein interaction networks to identify altered sub-networks of  
299 genes that connect to the flight performance phenotype. A local False Discovery Rate  
300 (lFDR) was calculated for each sex-based phenotype (S8 Table), for which gene-scores

301 were either  $-\log_{10}$  transformed if they passed or set to 0 if they did not. Transformed  
302 scores for each sex-based phenotype were analyzed together in Hierarchical  
303 HotNet [52], which returned a consensus network consisting of nine sub-networks of  
304 genes (S9 Table). The largest network identified 512 genes and was significantly  
305 enriched for several GO terms, including transcription factor binding, histone and  
306 chromatin modification, regulation of nervous system development, and regulation of  
307 apoptosis (S10 Table). The other eight networks were comprised of 27 genes, which  
308 together had several significant GO terms, including regulation of gene expression  
309 through alternative splicing, maintenance of the intestinal epithelium, and the  
310 Atg1/ULK1 kinase complex (S11 Table).

311

### 312 **Association of epistatic interactions with flight performance**

313 Epistatic interactions account for a substantial fraction of genetic variation in complex  
314 traits [53] but they are statistically and computationally challenging to identify. To  
315 circumvent the barriers associated with performing an exhaustive, pairwise search  
316 across all possible combinations ( $n = 1.81E12$ ), we turned to MArginal ePIstasis Test  
317 (MAPIT) to focus the search area. MAPIT is a linear mixed modeling approach that  
318 identifies variants more likely to have an effect on other variants. These putative hub  
319 variants represent more central and interconnected genes in a larger genetic network  
320 proposed by the Omnigenic Inheritance model [54, 55]. Accordingly, we identified 70  
321 unique significant marginal variants exceeding a Bonferroni threshold ( $P \leq 2.56E-8$ )  
322 across male, female, and sex-average phenotypes. The sex-difference analysis yielded  
323 no significant variants (S8 Fig; S12 Table). From these, only 14 had significant epistatic



324 interactions with other variants in the genome (S13 Table), which we will discuss in  
325 order of the male, female, and sex-average results and contextualized with their  
326 epistatic interactions.

327  
328 In males, there were seven significant marginal variants that mapped to five genes  
329 (*CG5645*, *CG18507*, *cv-c*, *sog*, *Ten-a*). Of the variants, only one (*X\_15527230\_SNP*)  
330 that mapped to a novel transcription start site in the BMP antagonist of *short*  
331 *gastrulation* (*sog*; human ortholog of *CHRD*) had significant interactions. This marginal  
332 SNP interacted with 42 other variants across 28 unique genes (S13 Table). Several of  
333 these genes are important in neuron development, signaling, and function (*CG13579*,  
334 *Dh31*, *nAChRalpha4*, *Sdc simj*, *sqz*, and *trio*), supporting accumulating evidence of a  
335 neurodevelopmental basis for variation in flight performance.

336  
337 In females, there were 14 significant marginal variants that mapped to six genes  
338 (*CG6123*, *CG7573*, *CG42741*, *ppk23*, *Src64B*, *twi*). Of these variants, five mapped to  
339 two genes (*CG42671* and *ppk23*) with epistatic interactions. One intronic SNP  
340 (*3L\_11217593\_SNP*) mapped to *CG42671*. Little is known about this gene and there  
341 are no human orthologs, but we can gain insights into its function based on the 51  
342 epistatic variants that mapped to 37 genes with annotations for regulation of gene  
343 expression (*arx*, *bi*, *CG6843*, *Ches-1-like*, *dve*, *HDAC1*, *Moe*, and *RpL26*, *Sdc*, *Tgi*), and  
344 neural development, signaling, and function (*cact*, *CG13579*, *HDAC1*, *ed*, *ngl3*, *nrm*,  
345 *numb*, *Sdc*). The other four variants (*X\_17459818\_SNP*, *X\_17459830\_SNP*,  
346 *X\_17460743\_DEL*, *X\_17460820\_SNP*) mapped to a 1002 bp region downstream of

347 *pickpocket 23* (*ppk23*; human homologs in ASIC gene family). *ppk23* is a member of the  
348 degenerin (DEG)/epithial Na<sup>+</sup> channel (ENaC) gene family that functions as subunits of  
349 non-voltage gated, amiloride-sensitive cation channels. It is involved in chemo- and  
350 mechanosensation, typically in the context of foraging, pheromone detection, and  
351 courtship behaviors [56, 57]. These marginal variants significantly interacted with 2162  
352 variants, which mapped to 1042 genes that were also largely found in the sex-average  
353 analysis.

354  
355 The sex-average phenotype had 62 significant marginal variants (11 also found in  
356 females) mapping to 21 genes (*Art2*, *CG10936*, *CG15630*, *CG15651*, *CG18507*,  
357 *CG3921*, *CG42671*, *CG42741*, *CG5645*, *CG6123*, *CG9313*, *CR44176*, *cv-c*, *Fad2*,  
358 *natalisin*, *ppk23*, *Rbfox1*, *Rgk1*, *Src64B*, *twi*). Of the 62 marginal variants, 18 had  
359 significant epistatic interactions: nine were intergenic, seven mapped to *ppk23*, and the  
360 remaining four mapped to single genes: *CG42671*, *CG10936*, *CG9313*, and *CG15651*  
361 (S13 Table). Previously identified in the female analysis, *ppk23* had the greatest  
362 number of interactions, placing it close to the center of a highly interconnected genetic  
363 landscape (Fig 4A). The seven marginal variants interacted with 4895 variants across  
364 2010 unique genes, 11 of which mapped to genes that also contained significant  
365 marginal variants (*A2bp1*, *cv-c*, *Fad2*, *CG9313*, *CG10936*, *CG42741*, *Rgk1*, *sog*,  
366 *Src64B*, *twi*, *Ten-a*). The 2010 unique genes had significant GO term enrichment for  
367 neuronal growth, organization and differentiation (S14 Table). One of *ppk23*'s  
368 interactors was *CG42671*, itself a gene with a significant marginal variant in the sex-  
369 average epistasis screen and previously mentioned in the female epistasis screen. For

370 the sex-average epistasis screen, *CG42671* interacted with 1013 variants across 616  
371 genes. These genes were significantly enriched in a gene set enrichment analysis for  
372 genes involved in neurodevelopment, particularly neuron growth and movement (S15  
373 Table). While this gene is understudied and lacks substantive annotations, but based on  
374 its interactors' significant GO categories, it is very likely *CG42671* is involved in growth  
375 and neuronal target finding. *CG10936* has few annotations, though it was identified in a  
376 screen for nociception [58]. It paired with 29 genes annotated for neurogenesis and  
377 function (*CG42788*, *Dh31*, *fru*, *hiw*, *lilli*, *nAChRalpha4*), as well as regulation of gene  
378 expression through chromatin modification (*Etl1* and *lilli*) and alternative splicing (*Srp54*  
379 and *U2af38*). One SNP (2R\_16871314\_SNP) was mapped to both the 3' UTR of  
380 *CG9313* and 29 bp downstream of *CG15651*. *CG9313* (orthologous to human DNAI1) is  
381 an ATP-dependent microtubule motor and is involved in the sensory perception of  
382 sound in *Drosophila* and proprioception, as well as sperm development [59]. *CG15651*  
383 is predicted to localize to the rough endoplasmic reticulum and Golgi body during  
384 embryogenesis, early larval, and late pupation stages where it is expressed in the  
385 central nervous system. Its human ortholog, FKRPF (fukutin related protein), is implicated  
386 in intellectual disability and it is a candidate gene therapy target for muscular dystrophy  
387 [60-62]. These genes' shared function in nervous system development is reflected in the  
388 variants that map to 87 genes with annotations for neuron development, patterning, and  
389 function (*5-HT2B*, *cwo*, *dally*, *dx*, *Dysb*, *enok*, *erm*, *mbl*, *Ng11*, *nmo*, *Sdc*, *Sema1a*,  
390 *sNPF*, *tup*,). Several genes were also annotated for endoplasmic reticulum function  
391 (*bark*, *CG5885*, *CG15651*, *Fatp3*, *PAPLA1*, *Trc8*, *Uggt*); chromatin remodeling  
392 (*CG43902*, *enok*, *erm*, *lncRNA:roX1*, *tim*); transcription and alternative splicing (*cwo*,

393 *bru3*, *CG6841*, *CG9650*, *CG15710*, *enok*, *luna*, *mb1*, *tim*, *tup*); and gene product  
394 regulation (*bru3*, *cwo*, *CG5885*, *CG9650*, *CG15710*, *luna*, *tRNA:Arg-TCT-2-1*, *tup*).  
395 Finally, there was a 669 bp region with six intergenic variants (chr3L:6890373 -  
396 6891042). This region lacked regulatory annotations, yet collectively interacted with 513  
397 variants mapping to 309 genes, many of which were shared with *ppk23*, *CG42671*, and  
398 *CG10936*. Similarly, these genes had significant GO term enrichment for  
399 neurodevelopment and neuron function (S16 Table).

400

401 **Fig 4. Flight performance is a larger complex trait comprised of several smaller**  
402 **traits.** (A) The genetic architecture of epistatically interacting genes generally  
403 coordinated through *ppk23*. A few other genes mapped to from marginal variants had  
404 epistatic interactions with marginal variants in *ppk23*. (B) Genes or genes mapped to  
405 from variants across different analyses were not identified in more than three analyses.  
406 Roughly half or more genes were unique to each analysis. (C) Flight performance has a  
407 complex genetic architecture, with the key developmental gene *Egfr* and BMP signaling  
408 pathway contributing to wing and neurodevelopment. These processes are both  
409 important for structuring the sensory organs that enable the fly to use mechanosensory  
410 channels for proprioception. Signals from the sensory organs on the wing, head, and  
411 body travel to the brain and thoracic ganglion, which sends signals through the motor  
412 neurons to the direct and indirect flight musculature that is also differentially assembled  
413 and innervated to generate power and control the wing angle during flight.

414

415 There were epistatic interactions between several of the genes identified from marginal  
416 variants (Fig 4A). Since marginal variants represent those more likely to interact with  
417 other variants, their interaction with one another suggests a highly interconnected  
418 genetic architecture underlying flight performance. Additionally, the breadth of epistatic  
419 interactions from a small, focused subset of marginal variants supports an important  
420 role for epistasis in the genetic architecture of flight performance. There are likely many  
421 more variants that interact with one another. But based on strong enrichment for  
422 neurodevelopmental genes from the very limited subset of marginal variants we tested,  
423 we hypothesize that flight performance in wildtype *Drosophila* is modulated by neural  
424 function and circuitry.

425

#### 426 **No evidence for adult transcriptome variation affecting flight performance**

427 Since many variants mapped to cis-regulatory elements and trans-regulatory genes, we  
428 sought to test whether regulatory variation was affecting developmental or adult  
429 homeostasis. Accordingly, performed a Weighted Gene Co-expression Network  
430 Analysis (WGCNA)[63] using 177 publically available DGRP transcriptomic profiles for  
431 young adults of both sexes [64]. We clustered genes by similarity in expression profile,  
432 then correlated those clusters' eigenvalues with the mean and standard deviation of  
433 flight performance, as well as the proportion of flies that fell through the column over the  
434 total assayed. No clusters across sex or phenotype had a significant correlation. This  
435 result squares well with our previous observation that many of the significant variants  
436 map to genes involved in pre-adult development, rather than genes that maintain adult  
437 homeostasis (S9 Fig).

438

439 **Flight performance is modulated by an interconnected genetic architecture**

440 The genetic architecture of flight performance is comprised of many different types of  
441 genetic modifiers. Many of the variants map to genes that are found across analytic  
442 platforms (Fig 4B). Most variants were unique to a single analysis, suggesting that  
443 association studies should consider using multiple different analyses to enhance the  
444 power to detect variants and genes in their study. However, many genes and genes  
445 identified from variants were identified in two (148) or three (23) analyses. Those  
446 involved in three analyses include: *aru*, *CG2964*, *CG13506*, *CG15651*, *CG17839*,  
447 *CG42671*, *CycE*, *daw*, *Diap1*, *Egfr*, *fz2*, *Gart*, *Gmap*, *Mbs*, *MED23*, *mip40*, *mxt*, *Pdp1*,  
448 *Rab30*, *rhea*, *sog*, *sona*, *Tgi*) analyses. This suggests that individual genes can contain  
449 variants with different types of effects or have differential contributions to the overall  
450 genetic architecture. A complete lookup table of all genes and genes identified from  
451 variants is available (S17 Table).

## 452 **Discussion**

453 We tested flight performance of 197 DGRP lines, identifying several additive and  
454 marginal variants, epistatic interactions, whole genes, and a consensus network of  
455 altered sub-networks that associated with variation our phenotype. We identified many  
456 cis-regulatory variants mapped to genes with annotations for wing morphology, indirect  
457 flight muscle performance, and neurodevelopment of sensory and neuromuscular  
458 junctions.

459

### 460 **Variation in gene regulation drives variation in flight performance**

461 Variation in gene expression is a major contributor to phenotypic variation [65, 66].  
462 Association studies with the DGRP lines often map variants to intergenic and non-  
463 coding regions of genes [22, 48, 67]. These regulatory elements can be cis-regulators,  
464 like transcription factor binding sites (TFBS), enhancers, or silencers; or they can be  
465 trans-regulatory, like transcription factors, splicosomes, or chromatin modifiers. In the  
466 present study, the vast majority of variants in the additive, marginal, and epistatic  
467 analyses mapped to introns or within 1kb of a gene, suggesting a cis-regulatory role.

468

469 When cis-regulatory elements lie in important developmental genes, their effects can be  
470 magnified as the organism continues through development. The most significant  
471 additive variant we identified mapped to an *epidermal growth factor receptor* (*Egfr*,  
472 human homolog *EGFR*) intron. Encoding a key transmembrane tyrosine kinase  
473 receptor, *Egfr* is a pleiotropic gene affecting developmental and homeostatic processes  
474 throughout the life and anatomy of the fly. It is well known for its role in embryonic

475 patterning and implications in human cancers [68, 69]. The variant also mapped to  
476 several overlapping TFBS for transcription factors known to affect embryonic  
477 development in a highly dose-dependent manner (*bcd, da, dl, gt, hb, kni, Med, prd, sna,*  
478 *tll, twi, disco, Trl*). Variation in patterning cells fated to become tissues and organs can  
479 be magnified through the adult stage, especially when that receptor is also known to  
480 affect other developmental processes [70]. Other intronic variants were identified in *Egfr*  
481 through the epistatic interactions with *ppk23*, illustrating how different types of genetic  
482 modifiers can exist within the same gene.

483

484 The role of cis- and trans-regulatory elements goes even further when there is variation  
485 in cis-regulatory elements of trans-regulatory genes. One of the Bonferroni additive  
486 variants mapped to an intronic region of *Forkhead domain 96Ca* (*fd96Ca*; human  
487 homologs *FOXB1* and *FOXB2*), a TFBS for *dorsal* (*dl*), and a silencer for *histone*  
488 *deacetylase 1* (*HDAC1*). *fd96Ca* is a fork head box transcription factor expressed in  
489 neuroblasts along the longitudinal axis of the embryo and in some sensory neurons in  
490 the embryonic head [71]. Trans-regulators, like *fd96Ca*, are proposed to have a large  
491 impact on phenotypic variation under the Omnigenic Inheritance model [54, 55]. Similar  
492 to *Egfr*, regulatory variation in a gene that helps determine cell fates can have larger  
493 effects if not enough cells are allocated for differentiation later in life. This can begin a  
494 cascade that amplifies downstream [72] and may hint at why trans-regulators were  
495 significant Gene Ontology (GO) terms in the consensus network.

496



497 There are likely non-coding regions of the genome that correspond with more cryptic  
498 regulatory regions. Six intergenic, marginal variants in a 669bp stretch (chr3L:6890373 -  
499 6891042) had a number of significant epistatic interactions with developmental and  
500 neurodevelopmental genes. These variants lacked regulatory annotations in the DGRP2  
501 annotation file, however these annotations were collected during embryogenesis [47] so  
502 it is possible these sites are activated by trans-regulators during different times in  
503 development. Nonetheless, based on its epistatic interactions, it is likely an important  
504 cis-regulatory region that affects general development from an early stage in the fly life  
505 cycle.

506  
507 Our results suggest genetic variation in regulatory (non-coding) regions has a greater  
508 affect on variation of flight performance than variation in protein coding regions. While  
509 non-synonymous variants can have large effects on flight performance [73-75], they  
510 were uncommon in our screen compared with variation in non-coding regions. This may  
511 be a result of strong purifying selection acting against them in a natural setting. Many of  
512 the candidate modifiers of flight are more commonly expressed during development [39,  
513 45, 46]. This observation is supported by our lack of evidence for adult transcriptomic  
514 variation correlating with flight performance. Additionally, the flight phenotype was highly  
515 heritable, suggesting our phenotype was not an artifact of environmental or  
516 experimental variation. Finally, the constructs we used to validate candidate genes  
517 created genetic variation in intronic regions, rather than post-transcriptionally modifying  
518 gene expression with an RNA<sup>i</sup> construct. Our successful validation of several candidate  
519 genes suggests variation in the non-coding regions of the candidate genes is sufficient

520 for observing phenotypic differences. Further, insertion of the constructs into intronic  
521 regions both positively and negatively affected performance, even when done at  
522 independent sites in the same gene, suggesting a more nuanced impact of genetic  
523 variation in cis-regulatory regions. We conclude that modifiers of cis- and trans-  
524 regulation in pre-adult stages are more likely to modify flight performance in wild  
525 populations than variation in coding sequence.

526

527

528 **Variation in wing and indirect flight muscle development contributes to variance**  
529 **in flight performance**

530 Flight performance is a complex trait comprised of coordination across several smaller  
531 developmental and functional, complex traits[13, 76, 77]. The central role of *Egfr* in  
532 development means it can have wide range of functional effects on adult morphology.  
533 Natural variants in *Egfr* are known to cause developmental differences in wing  
534 morphology that can significantly alter flight performance [70, 77], in part through  
535 interactions with the Bone Morphogenetic Protein (BMP) signaling pathway [13, 70, 78].  
536 BMP signaling is also an established modifier of wing development, as it forms dose-  
537 dependent gradients that pattern the wing size and shape [79, 80], as well as sensory  
538 and neuromuscular circuits [6, 81]. We identified several modifiers of BMP signaling  
539 (*cmpy*, *Cul2*, *cv-2*, *cv-c*, *dpp*, *dally*, *daw*, *egr*, *gbb*, *hiw*, *kek5*, *Lis-1*, *Lpt*, *lqf*, *ltl*, *Mad*,  
540 *nmo*, *scw*, *srw*, *Snoo*, *tkv*, *trio*) across all analyses and functionally validated *Snoo*—  
541 discussed below. Among the modifiers of BMP signaling, *short gastrulation* (*sog*; human  
542 homolog *Chordin*) stood out as a known source of natural variants that modifies flight

543 performance in natural populations [13]. *sog* affects wing morphology through its role as  
544 a *dpp* antagonist in patterning the dorsoventral axis of the wings [80, 82, 83]. *sog* is also  
545 noteworthy for its interconnectedness to other genes containing both a significant  
546 marginal variant and variants that had epistatic interactions with other significant  
547 marginal variants: *ppk23* and *CG42671* (formerly *CG18490* and *CG34240*)—discussed  
548 below. Marginal variants represent a class of variants that are statistically more likely to  
549 interact with other variants [84], via epistasis. Their identification hints at a more  
550 interconnected role in the genetic architecture. In this case, identification of *sog*  
551 suggests a more interconnected role for this antagonist of BMP signaling in modifying  
552 flight performance.

553  
554 In addition to wing morphology, we identified several modifiers known to affect flight  
555 muscle function. The indirect flight muscles (IFM) power flight through the alternating  
556 dorsoventral and dorsolongitudinal muscle contraction to deform the cuticle and move  
557 the wings [85, 86], while the direct flight muscles control flight through precise adjust of  
558 the wing angle [87]. We identified two genes with known roles in flight [88, 89] from the  
559 additive screen that we successfully validated: *Lasp* and *bru1*. *Lasp* (human ortholog  
560 *LASP1*), is the only nebulin family gene in *Drosophila*, and shown to modify sarcomere  
561 and thin filament length, and myofibril diameter [88]. We also identified *bruno 1* (*bru1* or  
562 *aret*; human homolog *CLEF1* and *CLEF2*), a transcription factor that controls alternative  
563 splicing of myofibrils in the IFM [9, 89], among other developmental processes. *bru1*  
564 had two intronic variants, one of which mapped to a TFBS for *twi*—one of the genes  
565 identified from a significant marginal variant.

566  
567 Using our newly developed platform `PEGASUS_flies` to find significant whole genes,  
568 we also identified *tropomodulin* (*tmod*; human homolog *TMOD1*) and *Glycerol-3-*  
569 *phosphate dehydrogenase 1* (*Gpdh1*; human homolog *GPD1*). These two genes were  
570 previously validated for their roles in flight performance [8, 90] and are responsible for  
571 muscle function and metabolism within muscles, respectively. The identification and  
572 previous validation of *tmod* and *Gpdh1* is noteworthy because neither had a significant  
573 variant exceed the additive screen's significance threshold ( $P \leq 1E-5$ ). This finding  
574 demonstrates a successful proof-of-principle for `PEGASUS_flies`' ability to identify  
575 genetic modifiers that would otherwise be overlooked in a traditional minSNP approach  
576 in an additive screen. Additionally, we successfully validated *fry*, identified in both the  
577 additive and whole gene screens. Taken together, the prior and current validation of  
578 these genes establishes `PEGASUS_flies` as a verified platform for identifying modifiers  
579 of complex traits.

580

### 581 **Neurodevelopmental genes play an important role in modifying flight** 582 **performance**

583 Many neurodevelopmental genes with diverse functions were identified across  
584 analyses. Because neurodevelopmental genes can play several roles, many of which  
585 are unannotated in GO databases, GO term enrichment analyses can be  
586 underpowered. This may explain why we failed to identify any GO terms for additive  
587 variants in the GOwinda analysis [22]. However, their identification through other GO  
588 analyses on the epistatic and network-based analyses is encouraging.

589

590 Several neurodevelopmental genes overlapped between the additive minSNP and  
591 PEGASUS\_flies whole gene approach. These genes (*aru*, *ChAT*, *Ccn*, *DIP- $\delta$* , *dsf*, *dsx*,  
592 *fry*, *Mbs*, *sdk*, *VACHT*), lend additional support to the likelihood these genes were not  
593 false positives. For example, *fry* and *Sidekick (sdk)* both coordinate dendritic target  
594 finding functions with DSCAM family genes [91, 92]. This is in agreement with several  
595 significant GO terms for axon guidance and neuronal targeting in the consensus  
596 network's largest sub-network (S11 Table) and for the genes identified from epistatic  
597 interactions with *ppk23*, *CG42671*, and an intergenic region (chr3L:6890373 -  
598 6891042)(S14-16 Tables). Accordingly neurodevelopmental genes are present  
599 throughout our study, and represent a highly interconnected group of genes that likely  
600 plays an important role in flight performance.

601

602 Underscoring this interconnectedness is the identification of several  
603 neurodevelopmental genes that mapped to epistatic interactions with a common,  
604 significant marginal variant in *sog*. This variant was significant in males and mapped to  
605 a new transcription start site. In addition to affecting wing morphology, *sog* also plays a  
606 role in neurodevelopment (*CG13579*, *dib*, *Hk*, *lncRNA:rox1*, *nAChR $\alpha$ 4*, *Sdc*, *simj*, *sqz*,  
607 *Toll-4*, *trio*) [36, 37, 81, 83]. Several of these genes were involved in neuromuscular  
608 growth and function (*CG13579*, *Hyperkinetic (Hk)*, *nicotinic acetylcholine receptor  $\alpha$  4*  
609 (*nAChR $\alpha$ 4*), *Syndecan (Sdc)*, *squeeze (sqz)*, *trio*) [81, 93-97], suggesting an important  
610 connection between neurodevelopmental phenotypes and their role in activating direct  
611 and indirect flight muscles. However, some of the genes interacting with *sog* can affect

612 sensory neurons as well. For example, *trio* is also present in sensory neurons and is  
613 capable of modifying chemosensation [21]. Other *sog* variants that had epistatic  
614 interactions with marginal variants in *CG42671* (formerly *CG18490* and *CG34240*) and  
615 *ppk23*—discussed below, two genes with known or putative roles in developing the  
616 peripheral nervous system (PNS).

617  
618 In addition to neuromuscular genes, we validated genes involved in patterning the PNS.  
619 One of the Bonferroni variants from the additive screen mapped to *Down Syndrome Cell*  
620 *Adhesion Molecule 4* (*Dscam4*; human ortholog *DSCAM*). DSCAMs are a conserved  
621 family of extracellular, immunoglobulin proteins that promote cell-cell adhesion. They are  
622 found in complex (type IV) dendrite arborization neurons that promote dendritic target  
623 recognition and dendrite self-avoidance in the developing PNS [34] and in the brain and  
624 central nervous system (CNS) [98, 99]. Type IV dendritic arborization neurons  
625 transduce signals from sensory neurons (e.g. photoreceptors, chemosensors, and  
626 mechanosensors), to the CNS [99-102]. Dscams are expressed differentially and  
627 combinatorially in different neurons, which allows them to create highly interconnected  
628 neural circuits [99]. They also work with other cell-cell adhesion proteins, like cadherins,  
629 in patterning the nervous system. *Cadherin-N* (*CadN* or *N-cad*) interacts with *Dscam2*  
630 and *Dscam4* in patterning olfactory receptor neurons (ORN), like *Or46a* (significant  
631 additive hit) and *Or59c* (significant epistatic hit with *ppk23*) [102-105]. Given their  
632 importance in patterning sensory neuron circuits and strong significance in the additive  
633 screen, we independently validated *Dscam4* and *CadN* using two separate insertional  
634 mutants for each. Both pairs of insertional mutants in both genes were significant,

635 though the direction of effect was reversed, reiterating how cis-regulatory regions can  
636 differentially affect genes' expression levels. Our double validation for each supports a  
637 greater level of confidence in *Dscam4* and *CadN* as modifiers of the peripheral nervous  
638 system important for flight performance.

639  
640 We validated two other dendrite patterning genes that also help to form sensory organs  
641 on the wing and body that contribute to proprioception: *furry* (*fry*; human homolog  
642 FRYL) and *Sno oncogene* (*Snoo* or *dSno*; human homolog SKI). These two conserved  
643 proteins are expressed along the same types of sensory neurons as Dscams and  
644 cadherins that promote dendrite field patterning, dendrite self-avoidance, and  
645 development of sensory organs [106]. *fry* assists Dscams and cadherins in dendritic  
646 tiling of chemosensors (olfaction or gustation) and mechanosensors (proprioception)  
647 [105-107] that directly connect to sensory microchaete (hairs or bristles) organized  
648 along the wing and body in specific patterns [108]. Meanwhile, *Snoo* interacts with the  
649 wingless pathway [6, 109], and is an important antagonist of *Medea* (*Med* or *dSmad4*;  
650 human homolog *Smad4*)—an important regulatory of the BMP-to-activin- $\beta$  pathway  
651 [110]. *Snoo* is known to modify wing shape [110], dendritic tiling, and the development  
652 of sensory organs (microchate and campaniform sensilla) on the wing [6, 111]. These  
653 sensory organs play different roles; wing chaete can function as chemosensors  
654 (olfaction and gustation) and mechanosensors [100, 112], while campaniform sensilla  
655 measure strain on the deformed wing blade [113-116]. Together, these sensory organs  
656 aid in proprioception of flight [11] and delineate a direct connection between the role of

657 proper development of the wings' sensory organs and the proper development of the  
658 neural circuitry connecting them to the CNS in modifying flight performance.

659

660 We functionally validated two candidate genes with only tangential evidence of their  
661 function that we are naming *flapper* (*flap*, formerly *CG11073*) and *flippy* (*flip*, formerly  
662 *CG9766*). *flapper* is expressed in the peripodial epithelium cells of the eye, leg, and  
663 wing imaginal discs [117]. It is expressed at very high levels during 16-18 hours of  
664 embryogenesis, pupariation [45] and in the head, eyes, and carcass in the adult stage  
665 [118]. It was previously identified as a candidate gene in a screen for modifiers of  
666 circadian rhythm [119] and was significantly upregulated in flies bred for aggressive  
667 behavior [120], but both studies failed to functionally validate the gene. *flapper* was also  
668 implicated in the downregulation of amyloid- $\beta$  peptides [121] and in late life fecundity  
669 [122] suggesting it may play a basic role in development that affects several  
670 phenotypes. Accordingly, we hypothesize it plays some role in patterning neural circuitry  
671 of sensory neurons on the cuticle and eyes, and facilitates neural circuit assembly in the  
672 brain. The other gene, *flippy* (human homolog *FANK1*), is pleiotropic with important  
673 roles in neuroanatomical development [43, 123] and sperm development [46]. It is  
674 important in the development of trichogen cells, which are precursors to the chaete flies  
675 use for mechanosensation. In humans, *FANK1* plays roles in spermatogenesis and  
676 apoptosis, and is a putative evolutionary target of balancing selection [124, 125]. Given  
677 *flippy*'s pleiotropic role in neurodevelopment and gametogenesis, it may also be under  
678 stabilizing selection brought about by contrasting selective pressures for neural function  
679 and fitness.



680  
681 Finally, qualitative observations of differentially performing DGRP lines support a role  
682 for proprioception as a modifier of flight performance. High-speed videos of strong,  
683 intermediate, and weak lines show strong lines react quicker to an abrupt free fall and  
684 are better at controlling their descent than the intermediate fliers, and much more than  
685 weak fliers. This direct evidence corroborates with the validation screen and inferential  
686 association analyses to support a role for natural variants in genes that affect 1) sensory  
687 neural circuit connectivity, 2) development and function of neuromuscular junctions, and  
688 3) the integration of these two onto wings of varying morphologies for modifying flight  
689 performance in a natural population.

690  
691 **Important implications for acid sensing ion channels in flight performance and**  
692 **neural function flight**

693 Pickpocket genes encode a conserved group of degenerin/epithelial sodium channels  
694 (DEG/ENaC) that function as non-voltage gated, amiloride-sensitive cation channels  
695 [56]. They are found in the brain, thoracic ganglion [57, 126], neuromuscular  
696 junctions[126, 127], and trachea [128], though pickpocket family genes are most  
697 commonly found along type IV dendrite arborization sensory neurons that connect  
698 chemo- or mechanosensory organs to the CNS [105-107, 126, 129-132] on the head,  
699 legs, and wings [57, 127, 133-136]. Chemosensing microchaete can contain olfactory  
700 receptor neurons (ORN), gustatory receptor neurons (GRN), and ionotropic receptors  
701 (IR), which are useful for foraging and pheromone detection [11, 57, 127, 133-139]. In  
702 this study, we identified six pickpocket genes (*ppk1*, *ppk8*, *ppk9*, *ppk10*, *ppk12*, *ppk23*),

703 10 gustatory receptors (*Gr10a*, *Gr10b*, *Gr28b*, *Gr36b*, *Gr36c*, *Gr39a*, *Gr59a*, *Gr59d*,  
704 *Gr61a*, *Gr64a*), 12 olfactory receptors and binding proteins (*Or24a*, *Or45a*, *Or46a*,  
705 *Or49a*, *Or59b*, *Or59c*, *Or67d*, *Or71a*, *Or85d*, *Obp8a*, *Obp28a*, *Obp47a*), and 13  
706 ionotropic receptors (*Ir41a*, *Ir47a*, *Ir47b*, *Ir51a*, *Ir56b*, *Ir56c*, *Ir56d*, *Ir60d*, *Ir60f*, *Ir62a*,  
707 *Ir64a*, *Ir67b*, *Ir75d*) from the additive, marginal, epistatic, and network approaches.  
708 *Or85d* was identified from the 2<sup>nd</sup> most significant additive variant and only non-  
709 synonymous SNP that passed a Bonferroni threshold in the additive search. And yet,  
710 despite a combined 41 pickpocket, gustatory receptor, olfactory receptor, and ionotropic  
711 receptor genes, only six (*ppk10*, *ppk12*, *Gr59d*, *Or24a*, *Ir41a*, and *Ir60d*) overlapped  
712 with an olfactory screen testing for genetic associations across 14 odors [21].

713 Accordingly, we hypothesize a more nuanced role for these chemosensors in aiding  
714 proprioception during flight.

715  
716 The magnitude of significant marginal variants and epistatic interactions that mapped to  
717 *ppk23* suggests this ion transporter has a much more interconnected role in the genetic  
718 architecture of flight performance than previously thought. *ppk23* is a modifier of flies'  
719 ability to track odors during free flight, but not a modifier of odorless flight [140]. Our  
720 results support a role for *ppk23* in modifying flight, along with all but eight (*Or46a*,  
721 *Or49a*, *Or85d*, *Gr36b*, *Gr36c*, *Ir60d*, *Ir60f*, *ppk10*) of the 41 previously listed pickpocket  
722 and chemoreceptor genes that *ppk23* interacted with. Like *sog*, *ppk23* is likely a central  
723 modifier of performance based on the number of epistatic interactions with variants  
724 mapping to genes identified in the marginal variant screen (*A2bp1/Rbfox1*, *cv-c*, *Fad2*,  
725 *CG9313*, *CG10936*, *CG42741*, *Rgk1*, *sog*, *Src64B*, *twi*, *Ten-a*). Some of these play

726 roles in sensory signal processing (*A2bp1/Rbfox1*, *CG9313*, *CG10936*, *Fad2*, *Rgk1*),  
727 neuron growth (*sog* and *Src64b*), neuromuscular junction development (*cv-c*, *Src64b*,  
728 *Ten-a*), and transcription factors (*A2bp1/Rbfox1*, *CG42741*, *twi*) [141, 142], several of  
729 which had significant epistatic interactions of their own. Of these, *CG10936* is proposed  
730 to be involved in sensory perception [142], but has limited annotations otherwise. Our  
731 work supports this hypothesized function. *ppk23*, in addition to these interactions, is  
732 known to modulate physiology and lifespan [143], broadening its canonical roles in  
733 chemo- and mechanosensation. Taken together, *ppk23* likely has strong connections to  
734 many systems beyond detection of stimulation that have deeper connections to  
735 organismal biology.

736  
737 The interconnectedness of *ppk23* also provides clues about the sexual dimorphism  
738 observed in flight. While males generally outperform females, likely due to differences in  
739 weight, sex failed to explain ~25% of the variation between the two groups. Like most  
740 pickpocket family genes, *ppk23* is well established as an important factor in  
741 chemosensation, pheromone detection, and courtship [57, 126, 130]—highly sex-  
742 specific phenotypes. One of *ppk23*'s epistatic interactions mapped to *fruitless* (*fru*;  
743 human homolog *ZBTB24*), a transcription factor responsible for sex-specific neural  
744 phenotypes involved in courtship and pheromone detection [144] that co-localizes with  
745 *ppk23* differentially between sexes, on the leg and wing microchaete [4, 57, 126, 127,  
746 143]. In addition to the PNS, *ppk23* and *fru* have sex-specific co-localization patterns in  
747 the thoracic ganglion. This cluster of neurons central to the “escape” response, allowing  
748 for ultra-fast processing of and response to flight-associated cues [11, 145]. Males show

749 more connections between *ppk23* and *fru* in the thoracic ganglion, and co-localization in  
750 neurons crossing the midline between the two sides of the anterior-most, pro-thoracic  
751 ganglion [57, 126]. *fru* is also expressed in vMS2 motor neurons connecting the thoracic  
752 ganglion to the flight musculature, likely involved in courtship song generation and  
753 aggression behaviors [146, 147]. The connection between sensory neurons, *ppk23*, *fru*,  
754 and motor neurons involved in wing motion draw a clear connection between a potential  
755 mechanism delineating the sex-difference phenotype we observed. Given the prior  
756 connections between *ppk23*, *sog*, and the epistatic interactions between them that  
757 annotate to sensory neurons and motor neuron neuromuscular junctions, there are  
758 likely other important connections underlying the ability of flies to process proprioceptive  
759 signals that are relayed directly to the flight musculature during our assay that have yet  
760 to be uncovered. Some of these connections may lie in the genes identified using  
761 PEGASUS\_flies' for the sex-difference analysis, like *doublesex* (*dsx*), an interactor of  
762 *fru* and *ppk1* in patterning sex-specific neural networks for courtship; dissatisfaction  
763 (*dsf*), a modifier of courtship behavior [146, 148-150]; and several other genes: *blue*  
764 *cheese* (*bchs*), *Ccn*, *CG13506*, *defective proboscis extension response 6* (*dpr6*), *pollux*  
765 (*plx*), *sidekick* (*sdk*), *eiger* (*egr*) [4, 34, 151, 152]. Further study of these genes may  
766 yield promising insights into the sex-differences we observed in flight performance, as  
767 well as sex-specific behavioral traits.

768

769 **A proposed model for understanding the genetic architecture of flight**  
770 **performance**

771 Flight performance is likely an epiphenomenon of several interconnected complex traits.  
772 While we are unable to identify every modifier, we likely identified the main components  
773 of the genetic architecture. Accordingly, we propose the following model to synthesize  
774 our findings (Fig 4C).

775  
776 Epidermal growth factor receptor is a key gene in a canonical developmental pathway. It  
777 can affect wing morphology, sensory organ development, and neurodevelopment, on its  
778 own and through the BMP signaling pathway. Proper development of these structures  
779 and circuits enables well-connected sensory neurons to receive external stimuli  
780 regarding proprioception. These signals are transduced through the thoracic ganglion,  
781 with sex-specific differences potentially modulated through *ppk23*, *fru*, and *dsx*. The  
782 thoracic ganglion processes these signals and activates motor neurons, which innervate  
783 the direct (control) and indirect (power) flight musculature at neuron muscular junctions.  
784 Activating these muscles allows the properly developed wings to flap and generate lift.

785

786

### 787 **Implications for BMP signaling and pickpocket genes in neuroinjury and**

### 788 **neurodegeneration**

789 The complexity of congenital, neurodegenerative diseases lies in the mix of genetic  
790 elements with very modest effect size. Association screens with *Drosophila* present a  
791 compelling model for identifying these sources of variation, especially in neuron-centric  
792 traits [25, 48, 153, 154]. Our results present a strong link between flight performance  
793 and BMP signaling—a proposed candidate pathway for therapeutic interventions in

794 several neurodegenerative diseases [30, 32, 155]. Mutations in *thickveins* (*tkv*) human  
795 homologs *BMPR1A* and *BMPR1B* are linked to familial Alzheimer's Disease [156], while  
796 mutants of *Superoxide dismutase 1* (*dSOD1*; human homolog *SOD1*) associated with  
797 Amyotrophic Lateral Sclerosis (ALS) can be rescued by activators of BMP signaling  
798 expressed in proprioceptive and motor neurons [157]. Our validation of the BMP  
799 antagonist *Snoo* confirms BMP signaling plays a role in flight performance. Given the  
800 number of epistatic interactions between *ppk23* and BMP signaling genes, it is very  
801 likely our data uncovers important modifiers of the BMP pathway that affect  
802 neurodysfunction in humans.

803

804 In addition to BMP signaling, we propose an expanded role for *ppk23*, and pickpocket  
805 family genes more generally, in neurobiology and neurodysfunction therapeutics. Acid  
806 Sensing Ion Channel (ASIC) family genes, the human homolog of the pickpocket family,  
807 can function as neuronal damage sensors. They detect drops in pH around neurons,  
808 often caused injury, damage, and dysfunction, which can elicit an inflammation  
809 response [31, 158]. These channels are found all over the brain and spinal column,  
810 supporting a functional and protective role following traumatic brain injury (concussion)  
811 and cerebral ischemia (stroke) [29, 31]. They are also identified as a potential target for  
812 genetic and/or pharmacological interventions of neurodegeneration and  
813 neuroinflammation [158]. Accordingly, our results break ground in identifying candidate  
814 genetic interactions that might be useful for such interventions.

815

816

## 817 **Materials and Methods**

### 818 **Drosophila Stocks and Husbandry**

819 All stocks were obtained from Bloomington *Drosophila* Stock Center  
820 (<https://bdsc.indiana.edu/>), including 197 *Drosophila* Genetic Reference Panel (DGRP)  
821 lines [20], 23 *Drosophila* Gene Disruption Project lines using the Mi{ET1} construct [159,  
822 160], and two genetic background lines ( $w^{1118}$  and  $y^1w^{67c23}$ ; S1 Table).

823

824 Flies were reared at 25° under a 12-h light-dark cycle. Stocks were density controlled  
825 and grown on a standard cornmeal media [161]. Two to three days post-eclosion, flies  
826 were sorted by sex under light CO<sub>2</sub> anesthesia and given five days to recover before  
827 phenotyping.

828

### 829 **Flight performance assay**

830 Flight performance was measured following the protocol refined by Babcock and  
831 Ganetzky [33]. Briefly, each sex-genotype combination consisted of approximately 100  
832 flies, divided into groups of 20 flies across five glass vials. These vials were gently  
833 tapped to draw flies down, and unplugged before a rapid inversion down a 25 cm chute.  
834 Vials stopped at the bottom, ejecting the flies into a 100 cm long x 13.5 cm diameter  
835 cylinder lined with a removable acrylic sheet coated in TangleTrap adhesive. Free  
836 falling flies instinctively right themselves before finding a place to land, which ended up  
837 immobilizing them at their respective landing height. Flies that passed through the  
838 column were caught in a pan of mineral oil and were excluded from the analysis.

839

840 After all vials in a run were released, the acrylic sheet was removed and pinned to a  
841 white poster board. A digital image was recorded on a fixed Raspberry PiCamera (V2)  
842 and the x,y coordinates of all flies were located with the ImageJ/FIJI Find Maxima  
843 function with a noise tolerance of 30 [162]. For each sex-genotype combination, the  
844 mean landing height was calculated for only the flies that landed on the acrylic sheet.

845

### 846 **High-speed video capture of flight column**

847 High-speed videos of flies leaving the flight column were recorded at 1540 frames per  
848 second using a Phantom Miro m340 camera recording at a resolution of 1920 x 1080  
849 with an exposure of 150  $\mu$ s (Data available in File S1). The camera was equipped with a  
850 Nikon Micro NIKKOR (105 mm, 1:2.8D) lens and Veritas Constellation 120 light source.

851

### 852 **Estimating heritability**

853 Individual fly landing heights were adjusted for covariate status by adding the difference  
854 between the DGRP webserver's adjusted and raw line means for each sex, and added  
855 them back to the individual landing height of the respective sex and genotype. Using  
856 these adjusted landing heights by sex, we performed a random effects analysis of  
857 variance using the R (v.3.5.2) package lme4 (v.1.1.23):  $Y \sim \mu + L + \varepsilon$ . Here,  $Y$  is the  
858 adjusted flight score,  $\mu$  is the combined mean,  $L$  is the line mean, and  $\varepsilon$  is the residual.  
859 From this, sex-specific broad sense heritability ( $H^2$ ) estimates were calculated from the  
860 among line ( $\sigma_L^2$ ) and error ( $\sigma_E^2$ ) variance components:  $H^2 = \sigma_L^2 / (\sigma_L^2 + \sigma_E^2)$ .

861

### 862 **Genome wide association mapping**



863 Flight performance scores for males and females were submitted to the DGRP2 GWAS  
864 pipeline (<http://dgrp2.gnets.ncsu.edu/>) [19, 20] and results for each sex, and the  
865 average (sex-average) and difference (sex-difference) between them were all  
866 considered (S3 Table). In total, 1,901,174 variants with a minor allele frequency (MAF)  
867  $\geq 0.05$  were analyzed (Data available in File S2). All reported additive variant  $P$ -values  
868 result from a linear mixed model analysis, including *Wolbachia* infection and presence  
869 of five major inversions as covariates. Variants were filtered for significance using the  
870 conventional  $P \leq 1E-5$  threshold [48]. Effect size estimates were calculated as one-half  
871 the difference between the mean landing heights for lines homozygous for the major vs.  
872 minor allele. The contribution of individual variants to the overall effects was estimated  
873 as the absolute value of an individual variant's effect size divided by the sum of the  
874 absolute values for all conventionally significant ( $P < 1e-5$ ) variants' effect sizes.

875

#### 876 **Candidate gene disruption screen**

877 Candidate genes were validated using insertional mutant stocks generated from Gene  
878 Disruption Project [51]. These stocks contain a *Minos* enhancer trap construct  
879  $Mi\{ET1\}[50]$  and were built on either  $w^{1118}$  or  $y^1 w^{67c23}$  backgrounds (BDSC\_6326 and  
880 BDSC\_6599, respectively).

881

882 Control and experiment line genetic backgrounds were isogenized with five successive  
883 rounds of backcrossing the insertional mutant line to its respective control. Validation of  
884 flight phenotypes was done using offspring of single-pair (1M x 1F) crosses between the  
885 control and insert lines. Heterozygous flies from these crosses were mated in pairs and

886 the homozygous offspring lacking the insertion were collected as the control. Candidate  
887 heterozygous/homozygous positive lines were mated as pairs once more and lines  
888 producing only homozygous positive offspring were used as experimental lines (S1 Fig).  
889 Experimental lines were checked for a GFP reporter three generations later to confirm  
890 their genotype. The finalized recombinant backcrossed control and experimental lines  
891 for each sex-genotype combination were assayed for flight performance, and tested for  
892 significance, via Mann-Whitney U-tests.

893

#### 894 **Calculating gene-score significance**

895 Gene-scores were calculated using Precise, Efficient Gene Association Score Using  
896 SNPs (PEGASUS) [28]. Originally implemented with human datasets, we modified the  
897 program to work with *Drosophila* datasets, which we call PEGASUS\_flies. It also  
898 contains default values adjusted for *Drosophila*, a linkage disequilibrium file, and gene  
899 annotations drawn from the FB5.57 annotation file, available on the DGRP webserver.  
900 PEGASUS\_flies is available at: [https://github.com/ramachandran-lab/PEGASUS\\_flies](https://github.com/ramachandran-lab/PEGASUS_flies),  
901 and as File S4.

902

#### 903 **Identifying altered sub-networks of gene-gene and protein-protein interaction** 904 **networks**

905 Returned gene-scores were filtered for genes of high confidence using the `Twilight`  
906 package (v.1.60.0) in R (Scheid and Spang 2005). Here, we estimated the local False  
907 Discovery Rate (IFDR) of all previously output gene scores using the `twilight` function.  
908 Taking the inflection point of the  $(1 - \text{IFDR})$  curve, our high-confidence gene scores

909 ranged from 0.65 – 0.73 for the four, sex-based phenotypes (S8 Table). High  
910 confidence genes were  $-\log_{10}$  transformed, while the remaining were set to 0.  
911  
912 Hierarchical HotNet was used to identify altered sub-networks of interacting  
913 genes or proteins [52] based on network topology generated from several gene-gene or  
914 protein-protein interaction networks. The four adjusted, sex-based gene-score vectors  
915 were mapped in the program to fifteen interaction networks obtained from High-quality  
916 INTeractomes (HINT)[163], the *Drosophila* Interactions Database (Droidb)[164, 165],  
917 and the *Drosophila* RNA<sup>i</sup> Screening Center (DRSC) Integrative Ortholog Prediction Tool  
918 (DIOPT)[166]. Consensus networks were calculated from 100 permutations of all four  
919 gene-score vectors on each of the fifteen interaction networks and filtered to include at  
920 least three members. The largest sub-network and the remaining eight sub-networks  
921 were passed to Gene Ontology enRiChment anaLysis and visualizAtion tool (GORilla) to  
922 identify enrichment for gene ontology (GO) categories [167, 168].

923

#### 924 **Screening for epistatic interactions**

925 Epistatic hub genes were identified using MArginal ePIstasis Test (MAPIT), a linear  
926 mixed modeling approach that tests the significance of each SNP's marginal effect on a  
927 chosen phenotype. MAPIT requires a complete genotype matrix, without missing data.  
928 SNPs were imputed using BEAGLE 4.1 [169, 170] and then filtered for  $MAF \geq 0.05$   
929 using VCFtools (v.0.1.16) [171]. MAPIT was run using the Davies method on the  
930 imputed genome (File S2), DGRP2 webserver-adjusted phenotype scores for each sex-

931 based phenotype (S2 Table), DGRP2 relatedness matrix, and covariate file containing  
932 *Wolbachia* infection and the presence of five major inversions.  
933  
934 Resulting marginal effect *P*-values (data available File S3) were filtered to a Bonferroni  
935 threshold ( $P \leq 2.56e-8$ ) and tested for pairwise epistatic interactions in a set-by-all  
936 framework against the initial 1,901,174 SNPs (unimputed;  $MAF \geq 0.05$ ) using the `PLINK`  
937 `-epistasis` flag (v.1.90)[172]. Results were filtered for all *P*-values that exceeded a  
938 Bonferroni threshold, calculated as  $0.05 / (\text{the number of Bonferroni marginal effect } P\text{-}$   
939  $\text{values} \times 1,901,174 \text{ SNPs})$ .

940

#### 941 **Annotating FBgn and orthologs**

942 Flybase gene (FBgn) identifiers were converted to their respective *D. melanogaster*  
943 (Dmel) or *H. sapiens* (Hsap) gene symbols using the *Drosophila* RNA<sup>i</sup> Stock Center  
944 (DRSC) Integrative Ortholog Prediction Tool (DIOPT)[42]. FBgn were filtered for all high  
945 to moderate confidence genes, or low confidence genes if they contained the best  
946 forward and reverse score.

947

#### 948 **Calculating an empirically simulated significance threshold**

949 We sought to simulate an empirically derived significance threshold that was unique to  
950 our data set and separate from the traditional DGRP and Bonferroni thresholds used in  
951 other studies. Using the genotype-phenotype matrix, two separate datasets were  
952 simulated ( $n = 1000$ ) for each sex-based phenotype. The first randomized the genotype-

953 phenotype matrix using all available line means, while the second randomized subsets  
954 of 150 genotype-phenotype pairs.

955

956 Simulated associations were run with `PLINK` [172](v.1.90) on each dataset type for  
957 each sex-based phenotype. The 5<sup>th</sup> percentile most-significant *P*-value across all  
958 permutations in a simulation type was deemed the “empirically simulated significance  
959 threshold.”

960

### 961 **GO term analysis**

962 GOWINDA [49] was implemented to perform a Gene Ontology (GO) analysis that  
963 corrects for gene size in GWA studies. We conducted this analysis for male (n=418),  
964 female (n=473), sex-average (n=527), and sex-difference (n=214) candidate SNPs  
965 exceeding a relaxed  $P < 1E-4$  significance threshold, against the 1,901,174 SNPs with  
966  $MAF \geq 0.05$ . We ran 100,000 simulations of GOWINDA using the gene mode and  
967 including all SNPs within 2000 bp.

968

969 Gene Ontology enRiChment anaLysis and visualizAtion tool (GORilla)[167, 168] was run  
970 on `PEGASUS_flies` gene-scores and `Hierarchical Hotnet` sub-networks using  
971 the default commands and a gene list compiled from all genes available in the FB5.57  
972 annotation file.

973

### 974 **Weighted Gene Co-expression Network Analysis**

975 To test whether ambient adult transcriptomes could explain the observed phenotypic  
976 variation, we turned to the publically available DGRP2 microarray data, downloaded  
977 from the DGRP2 webserver [20]. These data represent the transcriptomes for untreated  
978 young adult flies of each sex. We performed Weighted Gene Co-expression Network  
979 Analysis (WGCNA) analyses using the available R package [63] to cluster and correlate  
980 the expression profiles of genes from 177 shared, DGRP lines. This analysis was run  
981 using the following parameters: power = 16 (from soft threshold analysis  $\geq 0.9$ ), merging  
982 threshold = 0.0, signed network type, maximum blocksize = 1000, minimum module size  
983 = 30.

984

#### 985 **Data availability**

986 All data required to rerun the outlined analyses either publically available through  
987 FlyBase (<http://flybase.org/>) [34, 35, 39], the DGRP2 webserver  
988 (<http://dgrp2.gnets.ncsu.edu/>), or in the Supplement: S1-S18 tables,  
989 <https://doi.org/10.26300/v4rm-sa82>; S1 file, <https://doi.org/10.26300/dwvm-vt70>; S2 file,  
990 <https://doi.org/10.26300/317y-p682>; S3 file, <https://doi.org/10.26300/xcrh-c744>; S4 file,  
991 <https://doi.org/10.26300/qhc7-dp70>.

## 992 **Acknowledgements**

993 We thank Priya Nakka and Matthew A Reyna for their guidance through PEGASUS and  
994 Hierarchical HotNet, respectively. David Boerma for his assistance recording  
995 high-speed footage and F. Lemieux for maintaining *Drosophila* stocks. We are grateful  
996 for critical feedback from M. Tatar and T. Roberts and our anonymous reviewers.

997

## 998 **Conflict of Interest statement**

999 The authors declare no conflict of interest.

1000

## 1001 **Funding**

1002 This research was funded by National Institutes of Health grant GM067862 (to DMR).

1003

## 1004 **Author contributions**

1005 ANS, JAM, and DMR conceived and designed the study. ANS performed validation  
1006 crosses, while ANS and JAM collected data. ANS performed the statistical analyses  
1007 guidance from SR and LC. SPS and ANS designed and implemented PEGASUS\_flies.  
1008 ANS and DMR wrote the manuscript.

## 1009 **Supplemental Results**

### 1010 *Establishing an empirically defined significance threshold*

1011 While the Bonferroni significance threshold is conservative, the conventional  $P = 1E-5$   
1012 threshold might be considered lax. Accordingly, we simulated two sets of genotype-  
1013 phenotype matrices; one set “shuffled” the genotype-phenotype matrix while the other  
1014 set randomly “subsampling” 150 of the 197 lines.

1015  
1016 The significance threshold for each sex-based phenotype in each simulation was  
1017 determined by taking the 5<sup>th</sup> percentile of the most significant  $P$ -value across 1000  
1018 permutations [173]. Despite these efforts, the resulting significance thresholds were  
1019 even more stringent than the Bonferroni (S18 Table) and resulted in only one variant  
1020 (2R\_2718036\_DEL) mapping to *CG15236* and *CG34215* in the shuffled sex-difference  
1021 set. *CG15236*'s function is not well known, but it is expressed during embryogenesis  
1022 and pupariation in the developing brain and central nervous system and putatively  
1023 affects the wing veins [174, 175]. *CG34215* is less understood, though it is expressed at  
1024 varying levels throughout developmental and adult stages [34] and contains a single  
1025 domain Von Willebrand factor type C domain—thought to play a role in anti-viral  
1026 capabilities [176].



## 1027 **References**

1028

- 1029 1. Brodsky AK. The evolution of insect flight: Oxford University Press; 1994.
- 1030 2. Edwards JS. The evolution of insect flight: Implications for the evolution of the  
1031 nervous system. *Brain Behavior and Evolution*. 1997;50(1):8-12. doi:  
1032 10.1159/000113317. PubMed PMID: WOS:A1997XE45100002.
- 1033 3. Ugur B, Chen KC, Bellen HJ. Drosophila tools and assays for the study of human  
1034 diseases. *Disease Models & Mechanisms*. 2016;9(3):235-44. doi:  
1035 10.1242/dmm.023762. PubMed PMID: WOS:000371439600003.
- 1036 4. Pavlou HJ, Goodwin SF. Courtship behavior in *Drosophila melanogaster*:  
1037 towards a 'courtship connectome'. *Current Opinion in Neurobiology*.  
1038 2013;23(1):76-83. doi: 10.1016/j.conb.2012.09.002. PubMed PMID:  
1039 WOS:000314562900013.
- 1040 5. Weitkunat M, Schnorrer F. A guide to study *Drosophila* muscle biology. *Methods*.  
1041 2014;68(1):2-14. doi: <https://doi.org/10.1016/j.ymeth.2014.02.037>.
- 1042 6. Quijano JC, Stinchfield MJ, Zerlanko B, Gibbens YY, Takaesu NT, Hyman-Walsh  
1043 C, et al. The Sno Oncogene Antagonizes Wingless Signaling during Wing  
1044 Development in *Drosophila*. *Plos One*. 2010;5(7). doi:  
1045 10.1371/journal.pone.0011619. PubMed PMID: WOS:000279980800008.
- 1046 7. Nongthomba U, Pasalodos-Sanchez S, Clark S, Clayton JD, Sparrow JC.  
1047 Expression and function of the *Drosophila* ACT88F actin isoform is not restricted  
1048 to the indirect flight muscles. *Journal of muscle research and cell motility*.  
1049 2001;22(2):111-9.
- 1050 8. Montooth KL, Marden JH, Clark AG. Mapping determinants of variation in energy  
1051 metabolism, respiration and flight in *Drosophila*. *Genetics*. 2003;165(2):623-35.
- 1052 9. Kao SY, Nikonova E, Ravichandran K, Spletter ML. Dissection of *Drosophila*  
1053 *melanogaster* Flight Muscles for Omics Approaches. *Jove-Journal of Visualized*  
1054 *Experiments*. 2019;(152). doi: 10.3791/60309. PubMed PMID:  
1055 WOS:000493379500080.
- 1056 10. Frye MA, Dickinson MH. Closing the loop between neurobiology and flight  
1057 behavior in *Drosophila*. *Current Opinion in Neurobiology*. 2004;14(6):729-36. doi:  
1058 10.1016/j.conb.2004.10.004. PubMed PMID: WOS:000225988600011.
- 1059 11. Lehmann FO, Bartussek J. Neural control and precision of flight muscle  
1060 activation in *Drosophila*. *Journal of Comparative Physiology a-Neuroethology*  
1061 *Sensory Neural and Behavioral Physiology*. 2017;203(1):1-14. doi:  
1062 10.1007/s00359-016-1133-9. PubMed PMID: WOS:000393670200001.
- 1063 12. Okada H, Ebhardt HA, Vonesch SC, Aebersold R, Hafen E. Proteome-wide  
1064 association studies identify biochemical modules associated with a wing-size  
1065 phenotype in *Drosophila melanogaster*. *Nature Communications*. 2016;7. doi:  
1066 10.1038/ncomms12649. PubMed PMID: WOS:000384969200001.

- 1067 13. Marcus JM. The development and evolution of crossveins in insect wings.  
1068 Journal of Anatomy. 2001;199:211-6. doi: 10.1017/s0021878201008226.  
1069 PubMed PMID: WOS:000170738500022.
- 1070 14. Lobell AS, Kaspari RR, Negrón YLS, Harbison ST. The Genetic Architecture of  
1071 Ovariole Number in *Drosophila melanogaster*: Genes with Major, Quantitative,  
1072 and Pleiotropic Effects. *G3-Genes Genomes Genetics*. 2017;7(7):2391-403. doi:  
1073 10.1534/g3.117.042390. PubMed PMID: WOS:000404991600035.
- 1074 15. Watanabe K, Stringer S, Frei O, Mirkov MU, de Leeuw C, Polderman TJC, et al.  
1075 A global overview of pleiotropy and genetic architecture in complex traits. *Nature*  
1076 *Genetics*. 2019;51(9):1339-+. doi: 10.1038/s41588-019-0481-0. PubMed PMID:  
1077 WOS:000484010800010.
- 1078 16. McClellan J, King MC. Genetic Heterogeneity in Human Disease. *Cell*.  
1079 2010;141(2):210-7. doi: 10.1016/j.cell.2010.03.032. PubMed PMID:  
1080 WOS:000276738400008.
- 1081 17. Manolio TA, Collins FS, Cox NJ, Goldstein DB, Hindorf LA, Hunter DJ, et al.  
1082 Finding the missing heritability of complex diseases. *Nature*.  
1083 2009;461(7265):747-53. doi: 10.1038/nature08494. PubMed PMID:  
1084 WOS:000270547500027.
- 1085 18. McCarthy MI, Abecasis GR, Cardon LR, Goldstein DB, Little J, Ioannidis JPA, et  
1086 al. Genome-wide association studies for complex traits: consensus, uncertainty  
1087 and challenges. *Nature Reviews Genetics*. 2008;9(5):356-69. doi:  
1088 10.1038/nrg2344. PubMed PMID: WOS:000255057300012.
- 1089 19. Mackay TFC, Richards S, Stone EA, Barbadilla A, Ayroles JF, Zhu DH, et al. The  
1090 *Drosophila melanogaster* Genetic Reference Panel. *Nature*.  
1091 2012;482(7384):173-8. doi: 10.1038/nature10811. PubMed PMID:  
1092 WOS:000299994100029.
- 1093 20. Huang W, Massouras A, Inoue Y, Peiffer J, Ramia M, Tarone AM, et al. Natural  
1094 variation in genome architecture among 205 *Drosophila melanogaster* Genetic  
1095 Reference Panel lines. *Genome Research*. 2014;24(7):1193-208. doi:  
1096 10.1101/gr.171546.113. PubMed PMID: WOS:000338185000013.
- 1097 21. Arya GH, Magwire MM, Huang W, Serrano-Negrón YL, Mackay TFC, Anholt  
1098 RRH. The Genetic Basis for Variation in Olfactory Behavior in *Drosophila*  
1099 *melanogaster*. *Chemical Senses*. 2015;40(4):233-43. doi:  
1100 10.1093/chemse/bjv001. PubMed PMID: WOS:000355703500004.
- 1101 22. Chow CY, Wolfner MF, Clark AG. Large Neurological Component to Genetic  
1102 Differences Underlying Biased Sperm Use in *Drosophila*. *Genetics*.  
1103 2013;193(1):177-85. doi: 10.1534/genetics.112.146357. PubMed PMID:  
1104 WOS:000312894700011.
- 1105 23. Battlay P, Leblanc PB, Green L, Garud NR, Schmidt JM, Fournier-Level A, et al.  
1106 Structural Variants and Selective Sweep Foci Contribute to Insecticide

- 1107 Resistance in the Drosophila Genetic Reference Panel. *G3-Genes Genomes*  
1108 *Genetics*. 2018;8(11):3489-97. doi: 10.1534/g3.118.200619. PubMed PMID:  
1109 WOS:000449381500009.
- 1110 24. Chow CY, Kelsey KJP, Wolfner MF, Clark AG. Candidate genetic modifiers of  
1111 retinitis pigmentosa identified by exploiting natural variation in *Drosophila*.  
1112 *Human Molecular Genetics*. 2016;25(4):651-9. doi: 10.1093/hmg/ddv502.  
1113 PubMed PMID: WOS:000372151000003.
- 1114 25. Carbone MA, Yamamoto A, Huang W, Lyman RA, Meadors TB, Yamamoto R, et  
1115 al. Genetic architecture of natural variation in visual senescence in *Drosophila*.  
1116 *Proceedings of the National Academy of Sciences of the United States of*  
1117 *America*. 2016;113(43):E6620-E9. doi: 10.1073/pnas.1613833113. PubMed  
1118 PMID: WOS:000386087100012.
- 1119 26. Zhou SS, Morozova TV, Hussain YN, Luoma SE, McCoy L, Yamamoto A, et al.  
1120 The Genetic Basis for Variation in Sensitivity to Lead Toxicity in *Drosophila*  
1121 *melanogaster*. *Environmental Health Perspectives*. 2016;124(7):1062-70. doi:  
1122 10.1289/ehp.1510513. PubMed PMID: WOS:000380749300029.
- 1123 27. Montgomery SL, Vorojeikina D, Huang W, Mackay TFC, Anholt RRH, Rand MD.  
1124 Genome-Wide Association Analysis of Tolerance to Methylmercury Toxicity in  
1125 *Drosophila* Implicates Myogenic and Neuromuscular Developmental Pathways.  
1126 *Plos One*. 2014;9(10). doi: 10.1371/journal.pone.0110375. PubMed PMID:  
1127 WOS:000343943700033.
- 1128 28. Nakka P, Raphael BJ, Ramachandran S. Gene and Network Analysis of  
1129 Common Variants Reveals Novel Associations in Multiple Complex Diseases.  
1130 *Genetics*. 2016;204(2):783-+. doi: 10.1534/genetics.116.188391. PubMed PMID:  
1131 WOS:000385871400031.
- 1132 29. Xiong ZG, Xu TL. The role of ASICS in cerebral ischemia. *Wiley Interdisciplinary*  
1133 *Reviews: Membrane Transport and Signaling*. 2012;1(5):655-62.
- 1134 30. Deshpande M, Feiger Z, Shilton AK, Luo CC, Silverman E, Rodal AA. Role of  
1135 BMP receptor traffic in synaptic growth defects in an ALS model. *Molecular*  
1136 *Biology of the Cell*. 2016;27(19):2898-910. doi: 10.1091/mbc.E16-07-0519.  
1137 PubMed PMID: WOS:000385183000003.
- 1138 31. Huang Y, Jiang N, Li J, Ji YH, Xiong ZG, Zha XM. Two aspects of ASIC function:  
1139 Synaptic plasticity and neuronal injury. *Neuropharmacology*. 2015;94:42-8. doi:  
1140 10.1016/j.neuropharm.2014.12.010. PubMed PMID: WOS:000356735000007.
- 1141 32. Pinto C, Cardenas P, Osses N, Henriquez JP. Characterization of Wnt/beta-  
1142 catenin and BMP/Smad signaling pathways in an in vitro model of amyotrophic  
1143 lateral sclerosis. *Frontiers in Cellular Neuroscience*. 2013;7. doi:  
1144 10.3389/fncel.2013.00239. PubMed PMID: WOS:000327856200001.
- 1145 33. Babcock DT, Ganetzky B. An Improved Method for Accurate and Rapid  
1146 Measurement of Flight Performance in *Drosophila*. *Jove-Journal of Visualized*

- 1147 Experiments. 2014;(84). doi: 10.3791/51223. PubMed PMID:  
1148 WOS:000348604100055.
- 1149 34. dos Santos G, Schroeder AJ, Goodman JL, Strelets VB, Crosby MA, Thurmond  
1150 J, et al. FlyBase: introduction of the *Drosophila melanogaster* Release 6  
1151 reference genome assembly and large-scale migration of genome annotations.  
1152 *Nucleic Acids Research*. 2015;43(D1):D690-D7. doi: 10.1093/nar/gku1099.  
1153 PubMed PMID: WOS:000350210400101.
- 1154 35. Grumblin G, Strelets V, FlyBase C. FlyBase: anatomical data, images and  
1155 queries. *Nucleic Acids Research*. 2006;34:D484-D8. doi: 10.1093/nar/gkj068.  
1156 PubMed PMID: WOS:000239307700106.
- 1157 36. Carbon S, Douglass E, Dunn N, Good B, Harris NL, Lewis SE, et al. The Gene  
1158 Ontology Resource: 20 years and still GOing strong. *Nucleic Acids Research*.  
1159 2019;47(D1):D330-D8. doi: 10.1093/nar/gky1055. PubMed PMID:  
1160 WOS:000462587400049.
- 1161 37. Ashburner M, Ball CA, Blake JA, Botstein D, Butler H, Cherry JM, et al. Gene  
1162 Ontology: tool for the unification of biology. *Nature Genetics*. 2000;25(1):25-9.  
1163 doi: 10.1038/75556. PubMed PMID: WOS:000086884000011.
- 1164 38. Frise E, Hammonds AS, Celniker SE. Systematic image-driven analysis of the  
1165 spatial *Drosophila* embryonic expression landscape. *Molecular Systems Biology*.  
1166 2010;6. doi: 10.1038/msb.2009.102. PubMed PMID: WOS:000274193500002.
- 1167 39. Chintapalli VR, Wang J, Dow JAT. Using FlyAtlas to identify better *Drosophila*  
1168 *melanogaster* models of human disease. *Nature Genetics*. 2007;39(6):715-20.  
1169 doi: 10.1038/ng2049. PubMed PMID: WOS:000246859100012.
- 1170 40. Consortium TAoGR. Alliance of Genome Resources Portal: unified model  
1171 organism research platform. *Nucleic acids research*. 2020;48(D1):D650-D8.
- 1172 41. Gaudet P, Livstone MS, Lewis SE, Thomas PD. Phylogenetic-based propagation  
1173 of functional annotations within the Gene Ontology consortium. *Briefings in*  
1174 *Bioinformatics*. 2011;12(5):449-62. doi: 10.1093/bib/bbr042. PubMed PMID:  
1175 WOS:000295171700010.
- 1176 42. Hu YH, Flockhart I, Vinayagam A, Bergwitz C, Berger B, Perrimon N, et al. An  
1177 integrative approach to ortholog prediction for disease-focused and other  
1178 functional studies. *Bmc Bioinformatics*. 2011;12. doi: 10.1186/1471-2105-12-357.  
1179 PubMed PMID: WOS:000295225400001.
- 1180 43. Mummery-Widmer JL, Yamazaki M, Stoeger T, Novatchkova M, Bhalerao S,  
1181 Chen D, et al. Genome-wide analysis of Notch signalling in *Drosophila* by  
1182 transgenic RNAi. *Nature*. 2009;458(7241):987-U59. doi: 10.1038/nature07936.  
1183 PubMed PMID: WOS:000265412900033.
- 1184 44. Karr TL. Fruit flies and the sperm proteome. *Human Molecular Genetics*.  
1185 2007;16:R124-R33. doi: 10.1093/hmg/ddm252. PubMed PMID:  
1186 WOS:000251165500002.

- 1187 45. Casas-Vila N, Bluhm A, Sayols S, Dinges N, Dejung M, Altenhein T, et al. The  
1188 developmental proteome of *Drosophila melanogaster*. *Genome Research*.  
1189 2017;27(7):1273-85. doi: 10.1101/gr.213694.116. PubMed PMID:  
1190 WOS:000404735500016.
- 1191 46. Brown JB, Boley N, Eisman R, May GE, Stoiber MH, Duff MO, et al. Diversity  
1192 and dynamics of the *Drosophila* transcriptome. *Nature*. 2014;512(7515):393-9.  
1193 doi: 10.1038/nature12962. PubMed PMID: WOS:000340840600025.
- 1194 47. Negre N, Brown CD, Ma LJ, Bristow CA, Miller SW, Wagner U, et al. A cis-  
1195 regulatory map of the *Drosophila* genome. *Nature*. 2011;471(7339):527-31. doi:  
1196 10.1038/nature09990. PubMed PMID: WOS:000288702200065.
- 1197 48. Mackay TF, Huang W. Charting the genotype–phenotype map: lessons from the  
1198 *Drosophila melanogaster* Genetic Reference Panel. *Wiley Interdisciplinary*  
1199 *Reviews: Developmental Biology*. 2018;7(1).
- 1200 49. Kofler R, Schlötterer C. Gowinda: unbiased analysis of gene set enrichment for  
1201 genome-wide association studies. *Bioinformatics*. 2012;28(15):2084-5.
- 1202 50. Metaxakis A, Oehler S, Klinakis A, Savakis C. Minos as a genetic and genomic  
1203 tool in *Drosophila melanogaster*. *Genetics*. 2005;171(2):571-81. doi:  
1204 10.1534/genetics.105.041848. PubMed PMID: WOS:000233194500014.
- 1205 51. Bellen HJ, Levis RW, He YC, Carlson JW, Evans-Holm M, Bae E, et al. The  
1206 *Drosophila* Gene Disruption Project: Progress Using Transposons With  
1207 Distinctive Site Specificities. *Genetics*. 2011;188(3):731-U341. doi:  
1208 10.1534/genetics.111.126995. PubMed PMID: WOS:000292538900022.
- 1209 52. Reyna MA, Leiserson MDM, Raphael BJ. Hierarchical HotNet: identifying  
1210 hierarchies of altered subnetworks. *Bioinformatics*. 2018;34(17):972-80. doi:  
1211 10.1093/bioinformatics/bty613. PubMed PMID: WOS:000444317200045.
- 1212 53. Huang W, Richards S, Carbone MA, Zhu DH, Anholt RRH, Ayroles JF, et al.  
1213 Epistasis dominates the genetic architecture of *Drosophila* quantitative traits.  
1214 *Proceedings of the National Academy of Sciences of the United States of*  
1215 *America*. 2012;109(39):15553-9. doi: 10.1073/pnas.1213423109. PubMed PMID:  
1216 WOS:000309604500014.
- 1217 54. Liu XY, Li YI, Pritchard JK. Trans Effects on Gene Expression Can Drive  
1218 Omnigenic Inheritance. *Cell*. 2019;177(4):1022-+. doi:  
1219 10.1016/j.cell.2019.04.014. PubMed PMID: WOS:000466843000020.
- 1220 55. Boyle EA, Li YI, Pritchard JK. An Expanded View of Complex Traits: From  
1221 Polygenic to Omnigenic. *Cell*. 2017;169(7):1177-86. doi:  
1222 10.1016/j.cell.2017.05.038. PubMed PMID: WOS:000403332400008.
- 1223 56. Adams CM, Anderson MG, Motto DG, Price MP, Johnson WA, Welsh MJ.  
1224 Ripped pocket and pickpocket, novel *Drosophila* DEG/ENaC subunits expressed  
1225 in early development and in mechanosensory neurons. *Journal of Cell Biology*.

- 1226 1998;140(1):143-52. doi: 10.1083/jcb.140.1.143. PubMed PMID:  
1227 WOS:000071500600014.
- 1228 57. Lu BK, LaMora A, Sun YS, Welsh MJ, Ben-Shahar Y. ppk23-Dependent  
1229 Chemosensory Functions Contribute to Courtship Behavior in *Drosophila*  
1230 *melanogaster*. *Plos Genetics*. 2012;8(3). doi: 10.1371/journal.pgen.1002587.  
1231 PubMed PMID: WOS:000302254800062.
- 1232 58. Neely GG, Hess A, Costigan M, Keene AC, Goulas S, Langeslag M, et al. A  
1233 Genome-wide *Drosophila* Screen for Heat Nociception Identifies alpha 2 delta 3  
1234 as an Evolutionarily Conserved Pain Gene. *Cell*. 2010;143(4):628-38. doi:  
1235 10.1016/j.cell.2010.09.047. PubMed PMID: WOS:000284149100019.
- 1236 59. zur Lage P, Newton FG, Jarman AP. Survey of the Ciliary Motility Machinery of  
1237 *Drosophila* Sperm and Ciliated Mechanosensory Neurons Reveals Unexpected  
1238 Cell-Type Specific Variations: A Model for Motile Ciliopathies. *Frontiers in*  
1239 *Genetics*. 2019;10. doi: 10.3389/fgene.2019.00024. PubMed PMID:  
1240 WOS:000457405100001.
- 1241 60. Brockington M, Yuva Y, Prandini P, Brown SC, Torelli S, Benson MA, et al.  
1242 Mutations in the fukutin-related protein gene (FKRP) identify limb girdle muscular  
1243 dystrophy 2I as a milder allelic variant of congenital muscular dystrophy MDC1C.  
1244 *Human Molecular Genetics*. 2001;10(25):2851-9. doi: 10.1093/hmg/10.25.2851.  
1245 PubMed PMID: WOS:000172868200001.
- 1246 61. Inlow JK, Restifo LL. Molecular and comparative genetics of mental retardation.  
1247 *Genetics*. 2004;166(2):835-81. doi: 10.1534/genetics.166.2.835. PubMed PMID:  
1248 WOS:000220390600020.
- 1249 62. Vannoy CH, Xiao W, Lu PJ, Xiao X, Lu QL. Efficacy of Gene Therapy Is  
1250 Dependent on Disease Progression in Dystrophic Mice with Mutations in the  
1251 FKRP Gene. *Molecular Therapy-Methods & Clinical Development*. 2017;5:31-42.  
1252 doi: 10.1016/j.omtm.2017.02.002. PubMed PMID: WOS:000406299600004.
- 1253 63. Langfelder P, Horvath S. WGCNA: an R package for weighted correlation  
1254 network analysis. *BMC Bioinformatics*. 2008;9(1):559. doi: 10.1186/1471-2105-9-  
1255 559.
- 1256 64. Huang W, Carbone MA, Magwire MM, Peiffer JA, Lyman RF, Stone EA, et al.  
1257 Genetic basis of transcriptome diversity in *Drosophila melanogaster*.  
1258 *Proceedings of the National Academy of Sciences*. 2015;112(44):E6010-E9.
- 1259 65. Cheatle Jarvela AM, Hinman VF. Evolution of transcription factor function as a  
1260 mechanism for changing metazoan developmental gene regulatory networks.  
1261 *EvoDevo*. 2015;6(1):3. doi: 10.1186/2041-9139-6-3.
- 1262 66. Oleksiak MF, Churchill GA, Crawford DL. Variation in gene expression within and  
1263 among natural populations. *Nature genetics*. 2002;32(2):261.

- 1264 67. Wittkopp PJ, Haerum BK, Clark AG. Evolutionary changes in cis and trans gene  
1265 regulation. *Nature*. 2004;430(6995):85-8. doi: 10.1038/nature02698. PubMed  
1266 PMID: WOS:000222356800048.
- 1267 68. Crossman SH, Streichan SJ, Vincent JP. EGFR signaling coordinates patterning  
1268 with cell survival during *Drosophila* epidermal development. *Plos Biology*.  
1269 2018;16(10). doi: 10.1371/journal.pbio.3000027. PubMed PMID:  
1270 WOS:000449322300040.
- 1271 69. Sibililia M, Kroismayr R, Lichtenberger BM, Natarajan A, Hecking M, Holcman M.  
1272 The epidermal growth factor receptor: from development to tumorigenesis.  
1273 *Differentiation*. 2007;75(9):770-87. doi: 10.1111/j.1432-0436.2007.00238.x.  
1274 PubMed PMID: WOS:000250816400002.
- 1275 70. Paul L, Wang SH, Manivannan SN, Bonanno L, Lewis S, Austin CL, et al. Dpp-  
1276 induced Egfr signaling triggers postembryonic wing development in *Drosophila*.  
1277 *Proceedings of the National Academy of Sciences of the United States of*  
1278 *America*. 2013;110(13):5058-63. doi: 10.1073/pnas.1217538110. PubMed PMID:  
1279 WOS:000318031900048.
- 1280 71. Hacker U, Grossniklaus U, Gehring WJ, Jackle H. DEVELOPMENTALLY  
1281 REGULATED DROSOPHILA GENE FAMILY ENCODING THE FORK HEAD  
1282 DOMAIN. *Proceedings of the National Academy of Sciences of the United States*  
1283 *of America*. 1992;89(18):8754-8. doi: 10.1073/pnas.89.18.8754. PubMed PMID:  
1284 WOS:A1992JN50300071.
- 1285 72. Albert FW, Kruglyak L. The role of regulatory variation in complex traits and  
1286 disease. *Nature Reviews Genetics*. 2015;16(4):197-212. doi: 10.1038/nrg3891.  
1287 PubMed PMID: WOS:000352121800007.
- 1288 73. Haigh SE, Salvi SS, Sevdali M, Stark M, Goulding D, Clayton JD, et al.  
1289 *Drosophila* indirect flight muscle specific Act88F actin mutants as a model  
1290 system for studying congenital myopathies of the human ACTA1 skeletal muscle  
1291 actin gene. *Neuromuscular Disorders*. 2010;20(6):363-74. doi:  
1292 10.1016/j.nmd.2010.03.008. PubMed PMID: WOS:000279099100001.
- 1293 74. Drummond DR, Hennessey ES, Sparrow JC. CHARACTERIZATION OF  
1294 MISSENSE MUTATIONS IN THE ACT88F GENE OF DROSOPHILA-  
1295 MELANOGASTER. *Molecular & General Genetics*. 1991;226(1-2):70-80. doi:  
1296 10.1007/bf00273589. PubMed PMID: WOS:A1991FK53800010.
- 1297 75. Maughan DW, Vigoreaux IO. An integrated view of insect flight muscle: Genes,  
1298 motor molecules, and motion. *News in Physiological Sciences*. 1999;14:87-92.  
1299 PubMed PMID: WOS:000081066000001.
- 1300 76. Ennos AR. COMPARATIVE FUNCTIONAL-MORPHOLOGY OF THE WINGS OF  
1301 DIPTERA. *Zoological Journal of the Linnean Society*. 1989;96(1):27-47. doi:  
1302 10.1111/j.1096-3642.1989.tb01820.x. PubMed PMID: WOS:A1989U946600003.

- 1303 77. Pitchers W, Nye J, Marquez EJ, Kowalski A, Dworkin I, Houle D. A Multivariate  
1304 Genome-Wide Association Study of Wing Shape in *Drosophila melanogaster*.  
1305 *Genetics*. 2019;211(4):1429-47. doi: 10.1534/genetics.118.301342. PubMed  
1306 PMID: WOS:000463935700021.
- 1307 78. Hevia CF, Lopez-Varea A, Esteban N, de Celis JF. A Search for Genes  
1308 Mediating the Growth-Promoting Function of TGF beta in the *Drosophila*  
1309 *melanogaster* Wing Disc. *Genetics*. 2017;206(1):231-49. doi:  
1310 10.1534/genetics.116.197228. PubMed PMID: WOS:000401127800016.
- 1311 79. Cruz C, Glavic A, Casado M, de Celis JF. A Gain-of-Function Screen Identifying  
1312 Genes Required for Growth and Pattern Formation of the *Drosophila*  
1313 *melanogaster* Wing. *Genetics*. 2009;183(3):1005-26. doi:  
1314 10.1534/genetics.109.107748. PubMed PMID: WOS:000272295800021.
- 1315 80. Yu K, Sturtevant MA, Biehs B, Francois V, Padgett RW, Blackman RK, et al. The  
1316 *Drosophila* decapentaplegic and short gastrulation genes function  
1317 antagonistically during adult wing vein development. *Development*.  
1318 1996;122(12):4033-44. PubMed PMID: WOS:A1996WC55400034.
- 1319 81. Ball RW, Warren-Paquin M, Tsurudome K, Liao EH, Elazzouzi F, Cavanagh C, et  
1320 al. Retrograde BMP Signaling Controls Synaptic Growth at the NMJ by  
1321 Regulating Trio Expression in Motor Neurons. *Neuron*. 2010;66(4):536-49. doi:  
1322 10.1016/j.neuron.2010.04.011. PubMed PMID: WOS:000278771100009.
- 1323 82. O'Connor MB, Umulis D, Othmer HG, Blair SS. Shaping BMP morphogen  
1324 gradients in the *Drosophila* embryo and pupal wing. *Development*.  
1325 2006;133(2):183-93. PubMed PMID: WOS:000235345700001.
- 1326 83. Wharton KA, Serpe M. Fine-tuned shuttles for bone morphogenetic proteins.  
1327 *Current Opinion in Genetics & Development*. 2013;23(4):374-84. doi:  
1328 10.1016/j.gde.2013.04.012. PubMed PMID: WOS:000324362900003.
- 1329 84. Crawford L, Zeng P, Mukherjee S, Zhou X. Detecting epistasis with the marginal  
1330 epistasis test in genetic mapping studies of quantitative traits. *Plos Genetics*.  
1331 2017;13(7). doi: 10.1371/journal.pgen.1006869. PubMed PMID:  
1332 WOS:000406615300011.
- 1333 85. Lehmann FO, Dickinson MH. The changes in power requirements and muscle  
1334 efficiency during elevated force production in the fruit fly *Drosophila*  
1335 *melanogaster*. *Journal of Experimental Biology*. 1997;200(7):1133-43. PubMed  
1336 PMID: WOS:A1997WW57600007.
- 1337 86. Dickinson MH, Tu MS. The function of dipteran flight muscle. *Comparative*  
1338 *Biochemistry and Physiology a-Physiology*. 1997;116(3):223-38. doi:  
1339 10.1016/s0300-9629(96)00162-4. PubMed PMID: WOS:A1997WJ67300005.
- 1340 87. Kozopas KM, Nusse R. Direct flight muscles in *Drosophila* develop from cells  
1341 with characteristics of founders and depend on DWnt-2 for their correct



- 1342           patterning. *Developmental Biology*. 2002;243(2):312-25. doi:  
1343           10.1006/dbio.2002.0572. PubMed PMID: WOS:000174465500010.
- 1344   88.   Fernandes I, Schock F. The nebulin repeat protein Lasp regulates I-band  
1345           architecture and filament spacing in myofibrils. *Journal of Cell Biology*.  
1346           2014;206(4):559-72. doi: 10.1083/jcb.201401094. PubMed PMID:  
1347           WOS:000340739500009.
- 1348   89.   Spletter ML, Barz C, Yeroslaviz A, Schonbauer C, Ferreira IRS, Sarov M, et al.  
1349           The RNA-binding protein Arrest (Bruno) regulates alternative splicing to enable  
1350           myofibril maturation in *Drosophila* flight muscle. *Embo Reports*. 2015;16(2):178-  
1351           91. doi: 10.15252/embr.201439791. PubMed PMID: WOS:000350695600009.
- 1352   90.   Mardahl-Dumesnil M, Fowler VM. Thin filaments elongate from their pointed ends  
1353           during myofibril assembly in *Drosophila* indirect flight muscle. *Journal of Cell*  
1354           *Biology*. 2001;155(6):1043-53. doi: 10.1083/jcb.200108026. PubMed PMID:  
1355           WOS:000172730200017.
- 1356   91.   Fuerst PG, Burgess RW. Adhesion molecules in establishing retinal circuitry.  
1357           *Current Opinion in Neurobiology*. 2009;19(4):389-94. doi:  
1358           10.1016/j.conb.2009.07.013. PubMed PMID: WOS:000270107600007.
- 1359   92.   Yamagata M, Sanes JR. Dscam and Sidekick proteins direct lamina-specific  
1360           synaptic connections in vertebrate retina. *Nature*. 2008;451(7177):465-U6. doi:  
1361           10.1038/nature06469. PubMed PMID: WOS:000252554100045.
- 1362   93.   Hewes RS, Taghert PH. Neuropeptides and neuropeptide receptors in the  
1363           *Drosophila melanogaster* genome. *Genome research*. 2001;11(6):1126-42.
- 1364   94.   Ueda A, Wu CF. Effects of Social Isolation on Neuromuscular Excitability and  
1365           Aggressive Behaviors in *Drosophila*: Altered Responses by Hk and *gsts1*, Two  
1366           Mutations Implicated in Redox Regulation. *Journal of Neurogenetics*.  
1367           2009;23(4):378-94. doi: 10.3109/01677060903063026. PubMed PMID:  
1368           WOS:000271470500003.
- 1369   95.   Allan DW, St Pierre SE, Miguel-Aliaga I, Thor S. Specification of neuropeptide  
1370           cell identity by the integration of retrograde BMP signaling and a combinatorial  
1371           transcription factor code. *Cell*. 2003;113(1):73-86. doi: 10.1016/s0092-  
1372           8674(03)00204-6. PubMed PMID: WOS:000182282900008.
- 1373   96.   Fontaine B, Sassoon D, Buckingham M, Changeux J-P. Detection of the nicotinic  
1374           acetylcholine receptor alpha - subunit mRNA by in situ hybridization at  
1375           neuromuscular junctions of 15 - day - old chick striated muscles. *The EMBO*  
1376           *Journal*. 1988;7(3):603-9.
- 1377   97.   Nguyen MU, Kwong J, Chang J, Gillet VG, Lee RM, Johnson KG. The  
1378           extracellular and cytoplasmic domains of syndecan cooperate postsynaptically to  
1379           promote synapse growth at the *Drosophila* neuromuscular junction. *PLoS one*.  
1380           2016;11(3).

- 1381 98. Zhan XL, Clemens JC, Neves G, Hattori D, Flanagan JJ, Hummel T, et al.  
1382 Analysis of Dscam diversity in regulating axon guidance in *Drosophila* mushroom  
1383 bodies. *Neuron*. 2004;43(5):673-86. doi: 10.1016/j.neuron.2004.07.020. PubMed  
1384 PMID: WOS:000223691900013.
- 1385 99. Neves G, Zucker J, Daly M, Chess A. Stochastic yet biased expression of  
1386 multiple Dscam splice variants by individual cells. *Nature Genetics*.  
1387 2004;36(3):240-6. doi: 10.1038/ng1299. PubMed PMID:  
1388 WOS:000189250400012.
- 1389 100. Stocker RF. THE ORGANIZATION OF THE CHEMOSENSORY SYSTEM IN  
1390 *DROSOPHILA-MELANOGASTER* - A REVIEW. *Cell and Tissue Research*.  
1391 1994;275(1):3-26. doi: 10.1007/bf00305372. PubMed PMID:  
1392 WOS:A1994MM22200001.
- 1393 101. Smith SA, Shepherd D. Central afferent projections of proprioceptive sensory  
1394 neurons in *Drosophila* revealed with the enhancer-trap technique. *Journal of*  
1395 *Comparative Neurology*. 1996;364(2):311-23. PubMed PMID:  
1396 WOS:A1996TQ97200009.
- 1397 102. Tadros W, Xu SW, Akin O, Yi CH, Shin GJE, Millard SS, et al. Dscam Proteins  
1398 Direct Dendritic Targeting through Adhesion. *Neuron*. 2016;89(3):480-93. doi:  
1399 10.1016/j.neuron.2015.12.026. PubMed PMID: WOS:000373564900009.
- 1400 103. Hummel T, Zipursky L. Afferent induction of olfactory glomeruli requires N-  
1401 cadherin. *Neuron*. 2004;42(1):77-88. doi: 10.1016/s0896-6273(04)00158-8.  
1402 PubMed PMID: WOS:000221458400009.
- 1403 104. Hummel T, Vasconcelos ML, Clemens JC, Fishilevich Y, Vosshall LB, Zipursky  
1404 SL. Axonal targeting of olfactory receptor neurons in *Drosophila* is controlled by  
1405 Dscam. *Neuron*. 2003;37(2):221-31. doi: 10.1016/s0896-6273(02)01183-2.  
1406 PubMed PMID: WOS:000181054900008.
- 1407 105. Soba P, Zhu S, Emoto K, Younger S, Yang SJ, Yu HH, et al. *Drosophila* sensory  
1408 neurons require Dscam for dendritic self-avoidance and proper dendritic field  
1409 organization. *Neuron*. 2007;54(3):403-16. doi: 10.1016/j.neuron.2007.03.029.  
1410 PubMed PMID: WOS:000246855700011.
- 1411 106. Emoto K, He Y, Ye B, Grueber WB, Adler PN, Jan LY, et al. Control of dendritic  
1412 branching and tiling by the tricorned-kinase/furry signaling pathway in  
1413 *Drosophila* sensory neurons. *Cell*. 2004;119(2):245-56. doi:  
1414 10.1016/j.cell.2004.09.036. PubMed PMID: WOS:000224577200012.
- 1415 107. Matsubara D, Horiuchi SY, Shimono K, Usui T, Uemura T. The seven-pass  
1416 transmembrane cadherin Flamingo controls dendritic self-avoidance via its  
1417 binding to a LIM domain protein, Espinas, in *Drosophila* sensory neurons. *Genes*  
1418 *& Development*. 2011;25(18):1982-96. doi: 10.1101/gad.16531611. PubMed  
1419 PMID: WOS:000295082400009.

- 1420 108. Cong JL, Geng W, He B, Liu JC, Charlton J, Adler PN. The furry gene of  
1421 *Drosophila* is important for maintaining the integrity of cellular extensions during  
1422 morphogenesis. *Development*. 2001;128(14):2793-802. PubMed PMID:  
1423 WOS:000170209900015.
- 1424 109. Fischer S, Bayersdorfer F, Harant E, Reng R, Arndt S, Bosserhoff AK, et al.  
1425 *fussel (fuss)* - A Negative Regulator of BMP Signaling in *Drosophila*  
1426 *melanogaster*. *Plos One*. 2012;7(8). doi: 10.1371/journal.pone.0042349. PubMed  
1427 PMID: WOS:000307437900031.
- 1428 110. Takaesu NT, Hyman-Walsh C, Ye Y, Wisotzkey RG, Stinchfield MJ, O'Connor  
1429 MB, et al. *dSno* facilitates Baboon signaling in the *Drosophila* brain by switching  
1430 the affinity of *Medea* away from *Mad* and toward *dSmad2*. *Genetics*.  
1431 2006;174(3):1299-313.
- 1432 111. Luo K. Signaling cross talk between TGF- $\beta$ /Smad and other signaling pathways.  
1433 *Cold Spring Harbor perspectives in biology*. 2017;9(1):a022137.
- 1434 112. Furman D, Bukharina T. How *Drosophila melanogaster* forms its  
1435 mechanoreceptors. *Current genomics*. 2008;9(5):312-23.
- 1436 113. Ainsley JA, Pettus JM, Bosenko D, Gerstein CE, Zinkevich N, Anderson MG, et  
1437 al. Enhanced locomotion caused by loss of the *Drosophila* DEG/ENaC protein  
1438 *pickpocket1*. *Current Biology*. 2003;13(17):1557-63. doi: 10.1016/s0960-  
1439 9822(03)00596-7. PubMed PMID: WOS:000185171300028.
- 1440 114. Yamashita S, Takigahira T, Takahashi KH. Genome-wide association analysis of  
1441 host genotype and plastic wing morphological variation of an endoparasitoid  
1442 wasp *Asobara japonica* (Hymenoptera: Braconidae). *Genetica*. 2018;146(3):313-  
1443 21. doi: 10.1007/s10709-018-0022-2. PubMed PMID: WOS:000434148400006.
- 1444 115. Dickinson MH. COMPARISON OF ENCODING PROPERTIES OF  
1445 CAMPANIFORM SENSILLA ON THE FLY WING. *Journal of Experimental*  
1446 *Biology*. 1990;151:245-61. PubMed PMID: WOS:A1990DN79800014.
- 1447 116. Dickinson MH, Hannaford S, Palka J. The evolution of insect wings and their  
1448 sensory apparatus. *Brain Behavior and Evolution*. 1997;50(1):13-24. doi:  
1449 10.1159/000113318. PubMed PMID: WOS:A1997XE45100003.
- 1450 117. Firth LC, Baker NE. *Spitz* from the retina regulates genes transcribed in the  
1451 second mitotic wave, peripodial epithelium, glia and plasmatocytes of the  
1452 *Drosophila* eye imaginal disc. *Developmental Biology*. 2007;307(2):521-38. doi:  
1453 10.1016/j.ydbio.2007.04.037. PubMed PMID: WOS:000248019100027.
- 1454 118. Chintapalli VR, Wang J, Dow JA. Using FlyAtlas to identify better *Drosophila*  
1455 *melanogaster* models of human disease. *Nature genetics*. 2007;39(6):715-20.
- 1456 119. Harbison ST, Kumar S, Huang W, McCoy LJ, Smith KR, Mackay TFC. Genome-  
1457 Wide Association Study of Circadian Behavior in *Drosophila melanogaster*.  
1458 *Behavior Genetics*. 2019;49(1):60-82. doi: 10.1007/s10519-018-9932-0. PubMed  
1459 PMID: WOS:000455331800005.

- 1460 120. Dierick HA, Greenspan RJ. Molecular analysis of flies selected for aggressive  
1461 behavior. *Nature Genetics*. 2006;38(9):1023-31. doi: 10.1038/ng1864. PubMed  
1462 PMID: WOS:000240112100019.
- 1463 121. Page RM, Munch A, Horn T, Kuhn PH, Colombo A, Reiner O, et al. Loss of  
1464 PFAH1B2 Reduces Amyloid-beta Generation by Promoting the Degradation of  
1465 Amyloid Precursor Protein C-Terminal Fragments. *Journal of Neuroscience*.  
1466 2012;32(50):18204-14. doi: 10.1523/jneurosci.2681-12.2012. PubMed PMID:  
1467 WOS:000312404700026.
- 1468 122. Durham MF, Magwire MM, Stone EA, Leips J. Genome-wide analysis in  
1469 *Drosophila* reveals age-specific effects of SNPs on fitness traits. *Nature*  
1470 *Communications*. 2014;5. doi: 10.1038/ncomms5338. PubMed PMID:  
1471 WOS:000340615500029.
- 1472 123. Neumuller RA, Richter C, Fischer A, Novatchkova M, Neumuller KG, Knoblich  
1473 JA. Genome-Wide Analysis of Self-Renewal in *Drosophila* Neural Stem Cells by  
1474 Transgenic RNAi. *Cell Stem Cell*. 2011;8(5):580-93. doi:  
1475 10.1016/j.stem.2011.02.022. PubMed PMID: WOS:000290927600017.
- 1476 124. Zheng Z, Zheng H, Yan W. Fank1 is a testis-specific gene encoding a nuclear  
1477 protein exclusively expressed during the transition from the meiotic to the haploid  
1478 phase of spermatogenesis. *Gene Expression Patterns*. 2007;7(7):777-83. doi:  
1479 10.1016/j.modgep.2007.05.005. PubMed PMID: WOS:000249331000008.
- 1480 125. DeGiorgio M, Lohmueller KE, Nielsen R. A Model-Based Approach for Identifying  
1481 Signatures of Ancient Balancing Selection in Genetic Data. *Plos Genetics*.  
1482 2014;10(8). doi: 10.1371/journal.pgen.1004561. PubMed PMID:  
1483 WOS:000341577800047.
- 1484 126. Thistle R, Cameron P, Ghorayshi A, Dennison L, Scott K. Contact  
1485 chemoreceptors mediate male-male repulsion and male-female attraction during  
1486 *Drosophila* courtship. *Cell*. 2012;149(5):1140-51.
- 1487 127. Ben-Shahar Y. Sensory Functions for Degenerin/Epithelial Sodium Channels  
1488 (DEG/ENaC). In: Friedmann T, Dunlap JC, Goodwin SF, editors. *Advances in*  
1489 *Genetics*, Vol 76. *Advances in Genetics*. 762011. p. 1-26.
- 1490 128. Liu L, Johnson WA, Welsh MJ. *Drosophila* DEG/ENaC pickpocket genes are  
1491 expressed in the tracheal system, where they may be involved in liquid  
1492 clearance. *Proceedings of the National Academy of Sciences of the United*  
1493 *States of America*. 2003;100(4):2128-33. doi: 10.1073/pnas.252785099. PubMed  
1494 PMID: WOS:000181073000122.
- 1495 129. Ng R, Salem SS, Wu ST, Wu ML, Lin HH, Shepherd AK, et al. Amplification of  
1496 *Drosophila* Olfactory Responses by a DEG/ENaC Channel. *Neuron*.  
1497 2019;104(5):947-+. doi: 10.1016/j.neuron.2019.08.041. PubMed PMID:  
1498 WOS:000500919100012.

- 1499 130. Gorczyca DA, Younger S, Meltzer S, Kim SE, Cheng L, Song W, et al.  
1500 Identification of Ppk26, a DEG/ENaC Channel Functioning with Ppk1 in a  
1501 Mutually Dependent Manner to Guide Locomotion Behavior in *Drosophila*. *Cell*  
1502 *Reports*. 2014;9(4):1446-58. doi: 10.1016/j.celrep.2014.10.034. PubMed PMID:  
1503 WOS:000345529600025.
- 1504 131. Kuo CT, Jan LY, Jan YN. Dendrite-specific remodeling of *Drosophila* sensory  
1505 neurons requires matrix metalloproteases, ubiquitin-proteasome, and ecdysone  
1506 signaling. *Proceedings of the National Academy of Sciences of the United States*  
1507 *of America*. 2005;102(42):15230-5. doi: 10.1073/pnas.0507393102. PubMed  
1508 PMID: WOS:000232811800053.
- 1509 132. Grueber WB, Ye B, Moore AW, Jan LY, Jan YN. Dendrites of distinct classes of  
1510 *Drosophila* sensory neurons show different capacities for homotypic repulsion.  
1511 *Current Biology*. 2003;13(8):618-26. doi: 10.1016/s0960-9822(03)00207-0.  
1512 PubMed PMID: WOS:000182490000017.
- 1513 133. Mauthner SE, Hwang RY, Lewis AH, Xiao Q, Tsubouchi A, Wang Y, et al. Balboa  
1514 Binds to Pickpocket In Vivo and Is Required for Mechanical Nociception in  
1515 *Drosophila* Larvae. *Current Biology*. 2014;24(24). doi:  
1516 10.1016/j.cub.2014.10.038. PubMed PMID: WOS:000346580700022.
- 1517 134. Zelle KM, Lu BK, Pyfrom SC, Ben-Shahar Y. The Genetic Architecture of  
1518 Degenerin/Epithelial Sodium Channels in *Drosophila*. *G3-Genes Genomes*  
1519 *Genetics*. 2013;3(3):441-50. doi: 10.1534/g3.112.005272. PubMed PMID:  
1520 WOS:000315950000006.
- 1521 135. Paukert M, Sidi S, Russell C, Siba M, Wilson SW, Nicolson T, et al. A family of  
1522 acid-sensing ion channels from the zebrafish - Widespread expression in the  
1523 central nervous system suggests a conserved role in neuronal communication.  
1524 *Journal of Biological Chemistry*. 2004;279(18):18783-91. doi:  
1525 10.1074/jbc.M401477200. PubMed PMID: WOS:000221041500086.
- 1526 136. Jeong YT, Oh SM, Shim J, Seo JT, Kwon JY, Moon SJ. Mechanosensory  
1527 neurons control sweet sensing in *Drosophila*. *Nature Communications*. 2016;7.  
1528 doi: 10.1038/ncomms12872. PubMed PMID: WOS:000385384100006.
- 1529 137. Frye MA, Dickinson MH. Motor output reflects the linear superposition of visual  
1530 and olfactory inputs in *Drosophila*. *Journal of Experimental Biology*.  
1531 2004;207(1):123-31. doi: 10.1242/jeb.00725. PubMed PMID:  
1532 WOS:000189011000022.
- 1533 138. Taylor GK, Krapp HG. Sensory systems and flight stability: what do insects  
1534 measure and why? *Advances in insect physiology*. 2007;34:231-316.
- 1535 139. Sherman A, Dickinson MH. Summation of visual and mechanosensory feedback  
1536 in *Drosophila* flight control. *Journal of Experimental Biology*. 2004;207(1):133-42.  
1537 doi: 10.1242/jeb.00731. PubMed PMID: WOS:000189011000023.

- 1538 140. Houot B, Gigot V, Robichon A, Ferveur JF. Free flight odor tracking in  
1539 *Drosophila*: Effect of wing chemosensors, sex and pheromonal gene regulation.  
1540 Scientific Reports. 2017;7. doi: 10.1038/srep40221. PubMed PMID:  
1541 WOS:000391403200001.
- 1542 141. Shukla JP, Deshpande G, Shashidhara LS. Ataxin 2-binding protein 1 is a  
1543 context- specific positive regulator of Notch signaling during neurogenesis in  
1544 *Drosophila melanogaster*. Development. 2017;144(5):905-15. doi:  
1545 10.1242/dev.140657. PubMed PMID: WOS:000395650100018.
- 1546 142. Jin M, Aibar S, Ge ZQ, Chen R, Aerts S, Mardon G. Identification of novel direct  
1547 targets of *Drosophila* *Sine oculis* and *Eyes absent* by integration of genome-wide  
1548 data sets. Developmental Biology. 2016;415(1):157-67. doi:  
1549 10.1016/j.ydbio.2016.05.007. PubMed PMID: WOS:000378187700014.
- 1550 143. Gendron CM, Kuo TH, Harvanek ZM, Chung BY, Yew JY, Dierick HA, et al.  
1551 *Drosophila* Life Span and Physiology Are Modulated by Sexual Perception and  
1552 Reward. Science. 2014;343(6170):544-8. doi: 10.1126/science.1243339.  
1553 PubMed PMID: WOS:000330343700048.
- 1554 144. Kimura KI, Ote M, Tazawa T, Yamamoto D. Fruitless specifies sexually  
1555 dimorphic neural circuitry in the *Drosophila* brain. Nature. 2005;438(7065):229-  
1556 33. doi: 10.1038/nature04229. PubMed PMID: WOS:000233133500050.
- 1557 145. Strausfeld NJ. Brain and optic lobes. Encyclopedia of Insects: Elsevier; 2009. p.  
1558 121-30.
- 1559 146. Yu JY, Kanai MI, Demir E, Jefferis G, Dickson BJ. Cellular Organization of the  
1560 Neural Circuit that Drives *Drosophila* Courtship Behavior. Current Biology.  
1561 2010;20(18):1602-14. doi: 10.1016/j.cub.2010.08.025. PubMed PMID:  
1562 WOS:000282385600020.
- 1563 147. Ewing AW. NEUROMUSCULAR BASIS OF COURTSHIP SONG IN  
1564 *DROSOPHILA* - ROLE OF THE DIRECT AND AXILLARY WING MUSCLES.  
1565 Journal of Comparative Physiology. 1979;130(1):87-93. doi:  
1566 10.1007/bf02582977. PubMed PMID: WOS:A1979GS00900010.
- 1567 148. Shirangi TR, Wong AM, Truman JW, Stern DL. Doublesex Regulates the  
1568 Connectivity of a Neural Circuit Controlling *Drosophila* Male Courtship Song.  
1569 Developmental Cell. 2016;37(6):533-44. doi: 10.1016/j.devcel.2016.05.012.  
1570 PubMed PMID: WOS:000378204200008.
- 1571 149. Rezaval C, Pavlou HJ, Dornan AJ, Chan YB, Kravitz EA, Goodwin SF. Neural  
1572 Circuitry Underlying *Drosophila* Female Postmating Behavioral Responses.  
1573 Current Biology. 2012;22(13):1155-65. doi: 10.1016/j.cub.2012.04.062. PubMed  
1574 PMID: WOS:000306379600018.
- 1575 150. Finley KD, Taylor BJ, Milstein M, McKeown M. dissatisfaction, a gene involved in  
1576 sex-specific behavior and neural development of *Drosophila melanogaster*.  
1577 Proceedings of the National Academy of Sciences. 1997;94(3):913-8.

- 1578 151. Billeter JC, Vellella A, Allendorfer JB, Dornan AJ, Richardson M, Gailey DA, et al.  
1579 Isoform-specific control of male neuronal differentiation and behavior in  
1580 *Drosophila* by the fruitless gene. *Current Biology*. 2006;16(11):1063-76. doi:  
1581 10.1016/j.cub.2006.04.039. PubMed PMID: WOS:000238245900019.
- 1582 152. Finley KD, Taylor BJ, Milstein M, McKeown M. dissatisfaction, a gene involved in  
1583 sex-specific behavior and neural development of *Drosophila melanogaster*.  
1584 *Proceedings of the National Academy of Sciences of the United States of*  
1585 *America*. 1997;94(3):913-8. doi: 10.1073/pnas.94.3.913. PubMed PMID:  
1586 WOS:A1997WG23400026.
- 1587 153. Chow CY, Reiter LT. Etiology of Human Genetic Disease on the Fly. *Trends in*  
1588 *Genetics*. 2017.
- 1589 154. Lavoy S, Chittoor-Vinod VG, Chow CY, Martin I. Genetic Modifiers of  
1590 Neurodegeneration in a *Drosophila* Model of Parkinson's Disease. *Genetics*.  
1591 2018;209(4):1345-56. doi: 10.1534/genetics.118.301119. PubMed PMID:  
1592 WOS:000440014100024.
- 1593 155. Bayat V, Jaiswal M, Bellen HJ. The BMP signaling pathway at the *Drosophila*  
1594 neuromuscular junction and its links to neurodegenerative diseases. *Current*  
1595 *Opinion in Neurobiology*. 2011;21(1):182-8. doi: 10.1016/j.conb.2010.08.014.  
1596 PubMed PMID: WOS:000288876100024.
- 1597 156. Kang MJ, Hansen TJ, Mickiewicz M, Kaczynski TJ, Fye S, Gunawardena S.  
1598 Disruption of Axonal Transport Perturbs Bone Morphogenetic Protein (BMP) -  
1599 Signaling and Contributes to Synaptic Abnormalities in Two Neurodegenerative  
1600 Diseases. *Plos One*. 2014;9(8). doi: 10.1371/journal.pone.0104617. PubMed  
1601 PMID: WOS:000340879300038.
- 1602 157. Held A, Major P, Sabin A, Reenan RA, Lipscombe D, Wharton KA. Circuit  
1603 Dysfunction in SOD1-ALS Model First Detected in Sensory Feedback Prior to  
1604 Motor Neuron Degeneration Is Alleviated by BMP Signaling. *Journal of*  
1605 *Neuroscience*. 2019;39(12):2347-64. doi: 10.1523/jneurosci.1771-18.2019.  
1606 PubMed PMID: WOS:000461756300015.
- 1607 158. Ortega-Ramirez A, Vega R, Soto E. Acid-Sensing Ion Channels as Potential  
1608 Therapeutic Targets in Neurodegeneration and Neuroinflammation. *Mediators of*  
1609 *Inflammation*. 2017. doi: 10.1155/2017/3728096. PubMed PMID:  
1610 WOS:000411707000001.
- 1611 159. Bellen HJ, Levis RW, He Y, Carlson JW, Evans-Holm M, Bae E, et al. The  
1612 *drosophila* gene disruption project: progress using transposons with distinctive  
1613 site-specificities. *Genetics*. 2011;genetics. 111.126995.
- 1614 160. Metaxakis A, Oehler S, Klinakis A, Savakis C. Minos as a genetic and genomic  
1615 tool in *Drosophila melanogaster*. *Genetics*. 2005.

- 1616 161. Elgin S, Miller D. Special techniques for tissue isolation and injection. II. Mass  
1617 rearing of flies and mass production and harvesting of embryos. *Genetics and*  
1618 *biology of Drosophila*. 1978.
- 1619 162. Schindelin J, Arganda-Carreras I, Frise E, Kaynig V, Longair M, Pietzsch T, et al.  
1620 Fiji: an open-source platform for biological-image analysis. *Nature Methods*.  
1621 2012;9(7):676-82. doi: 10.1038/nmeth.2019. PubMed PMID:  
1622 WOS:000305942200021.
- 1623 163. Das J, Yu HY. HINT: High-quality protein interactomes and their applications in  
1624 understanding human disease. *Bmc Systems Biology*. 2012;6. doi:  
1625 10.1186/1752-0509-6-92. PubMed PMID: WOS:000310442400001.
- 1626 164. Yu JK, Pacifico S, Liu GZ, Finley RL. DroiD: the Drosophila Interactions  
1627 Database, a comprehensive resource for annotated gene and protein  
1628 interactions. *Bmc Genomics*. 2008;9. doi: 10.1186/1471-2164-9-461. PubMed  
1629 PMID: WOS:000260678600001.
- 1630 165. Murali T, Pacifico S, Yu JK, Guest S, Roberts GG, Finley RL. DroiD 2011: a  
1631 comprehensive, integrated resource for protein, transcription factor, RNA and  
1632 gene interactions for Drosophila. *Nucleic Acids Research*. 2011;39:D736-D43.  
1633 doi: 10.1093/nar/gkq1092. PubMed PMID: WOS:000285831700117.
- 1634 166. Hu Y, Flockhart I, Vinayagam A, Bergwitz C, Berger B, Perrimon N, et al. An  
1635 integrative approach to ortholog prediction for disease-focused and other  
1636 functional studies. *BMC bioinformatics*. 2011;12(1):357.
- 1637 167. Eden E, Navon R, Steinfeld I, Lipson D, Yakhini Z. GOrilla: a tool for discovery  
1638 and visualization of enriched GO terms in ranked gene lists. *Bmc Bioinformatics*.  
1639 2009;10. doi: 10.1186/1471-2105-10-48. PubMed PMID:  
1640 WOS:000264007400001.
- 1641 168. Eden E, Lipson D, Yogev S, Yakhini Z. Discovering motifs in ranked lists of DNA  
1642 sequences. *Plos Computational Biology*. 2007;3(3):508-22. doi:  
1643 10.1371/journal.pcbi.0030039. PubMed PMID: WOS:000246191000017.
- 1644 169. Browning SR, Browning BL. Rapid and accurate haplotype phasing and missing-  
1645 data inference for whole-genome association studies by use of localized  
1646 haplotype clustering. *American Journal of Human Genetics*. 2007;81(5):1084-97.  
1647 doi: 10.1086/521987. PubMed PMID: WOS:000250480900018.
- 1648 170. Browning BL, Browning SR. Genotype Imputation with Millions of Reference  
1649 Samples. *American Journal of Human Genetics*. 2016;98(1):116-26. doi:  
1650 10.1016/j.ajhg.2015.11.020. PubMed PMID: WOS:000368050800009.
- 1651 171. Danecek P, Auton A, Abecasis G, Albers CA, Banks E, DePristo MA, et al. The  
1652 variant call format and VCFtools. *Bioinformatics*. 2011;27(15):2156-8. doi:  
1653 10.1093/bioinformatics/btr330. PubMed PMID: WOS:000292778700023.
- 1654 172. Purcell S, Neale B, Todd-Brown K, Thomas L, Ferreira MAR, Bender D, et al.  
1655 PLINK: A tool set for whole-genome association and population-based linkage



- 1656 analyses. American Journal of Human Genetics. 2007;81(3):559-75. doi:  
1657 10.1086/519795. PubMed PMID: WOS:000249128200012.
- 1658 173. Doerge RW, Churchill GA. Permutation Tests for Multiple Loci Affecting a  
1659 Quantitative Character. Genetics. 1996;142(1):285-94.
- 1660 174. Krupp JJ, Yaich LE, Wessells RJ, Bodmer R. Identification of genetic loci that  
1661 interact with cut during *Drosophila* wing-margin development. Genetics.  
1662 2005;170(4):1775-95. doi: 10.1534/genetics.105.043125. PubMed PMID:  
1663 WOS:000232033300028.
- 1664 175. Vonesch SC, Lamparter D, Mackay TFC, Bergmann S, Hafen E. Genome-Wide  
1665 Analysis Reveals Novel Regulators of Growth in *Drosophila melanogaster*. PLOS  
1666 Genetics. 2016;12(1):e1005616. doi: 10.1371/journal.pgen.1005616.
- 1667 176. Chen YH, Jia XT, Zhao L, Li CZ, Zhang SA, Chen YG, et al. Identification and  
1668 functional characterization of Dicer2 and five single VWC domain proteins of  
1669 *Litopenaeus vannamei*. Developmental and Comparative Immunology.  
1670 2011;35(6):661-71. doi: 10.1016/j.dci.2011.01.010. PubMed PMID:  
1671 WOS:000289333600005.
- 1672
- 1673

1674 **Supporting information**

1675 **S1 Fig. DGRP lines' mean flight performance is highly repeatable across**

1676 **generations.** Set of genotypes ( $n = 12$ ) reared 10 generations apart show very  
1677 strong agreement ( $r = 0.95$ ) in mean flight performance scores. The regression  
1678 line (red line) through the point pairs (black points) has nearly the same slope  
1679 and y-intercept as the  $x = y$  line (gray dashed line).

1680 **S2 Fig. Sex-average and sex-difference phenotypic distributions are amenable to**

1681 **an association study.** Distribution in mean landing height (m) for (A) sex-  
1682 average and (B) sex-difference phenotypes suggest ample phenotypic variation  
1683 exists to run an association study. Each plot is sorted in order of increasing  
1684 phenotype score, independent of one another.

1685 **S3 Fig. QQ-plots show enrichment for some additive variants across each of the**

1686 **sex-based phenotypes.** Plots comparing the theoretical vs. observed  $P$ -value  
1687 distribution across (A) males, (B) females, (C) sex-average, and (D) sex-  
1688 difference phenotypes. Red line denotes  $y = x$ .

1689 **S4 Fig. Top additive associations are spaced throughout the genome.** Top additive

1690 variants, those reported in DGRP2 webserver file with the `top.annot` suffix, are  
1691 largely free of linkage blocks. There is a larger block on X, corresponding with 10  
1692 variants that map to intronic and one synonymous coding site in *CG32506*. The  
1693 heat component corresponds with likelihood of being in a linkage block from less  
1694 (0 - blue) to more likely (1 - red).

1695 **S5 Fig. Additional sex-based phenotype Manhattan plots for additive analysis. (A)**

1696 Males, (B) females, and (C) sex-difference phenotypes all have significant

1697 additive variants pass a traditional DGRP threshold ( $P \leq 1E-5$ , gray solid line, red  
1698 points), and at least one variant pass a Bonferroni threshold ( $P \leq 2.63E-8$ , gray  
1699 dashed line, red dot with black outline). Variants are arranged in order of relative  
1700 genomic position by chromosome and plotted by the  $-\log_{10}$  of the  $P$ -value. The  
1701 sex-average is displayed in text.

1702 **S6 Fig. Genetic crosses performed for deriving experimental and control stocks**

1703 **used to validate candidate genes.** All crosses are represented with females on  
1704 the left and males on the right. Ten single pair crosses of a female genetic  
1705 control, either  $w^{1118}$  (pictured) or  $y[1] w[67c23]$ , in white boxes were crossed with  
1706 the respective  $M\{ET1\}$  insertional mutant line in green boxes. After the initial  
1707 cross, heterozygous flies were backcrossed to the respective genetic control for  
1708 five generations. In the sixth generation, single pairs of heterozygous flies were  
1709 crossed. Progeny without the  $Avic\backslash GFPE^{3xP3}$  marker were collected as  
1710 homozygous nulls, while several vials of putatively homozygous mutants (no  
1711 progeny without marker) were crossed again to confirm genotype. Stocks were  
1712 monitored for two additional generations to confirm mutant carrier status before a  
1713 homozygous mutant stock was selected as an experimental line.

1714

1715 **S7 Fig. Significant whole genes are distributed throughout the genome and sex-**

1716 **based phenotypes.** Whole gene analyses conducted with `PEGASUS_flies` for  
1717 (A) males, (B) females, and (C) sex-difference phenotypes showed enrichment  
1718 for significant whole genes across these three, and the sex-average (displayed in  
1719 text). Each dot represents a whole gene, ordered by position across the

1720 chromosomes and plotted as the  $-\log_{10}$  of the gene-score. Points above the  
1721 Bonferroni threshold ( $P \leq 3.03E-6$ , gray line) are colored in red.

1722

1723 **S8 Fig. Significant marginal variants are unevenly distributed across sex-based**

1724 **phenotypes.** (A) Males had very few significant variants pass a Bonferroni

1725 threshold ( $P \leq 2.56E-8$ , gray solid line, red points), while (B) females had more

1726 and (C) sex-average had the most. (D) Sex-difference had no significant

1727 marginal variants. Variants are arranged in order of relative genomic position by

1728 chromosome and significance scores  $-\log_{10}$  transformed.

1729

1730 **S9 Fig. Trait-relationship correlation matrix shows no correlation between**

1731 **measured phenotypes and young adult transcriptome.** Neither sexes' mean

1732 landing height, standard deviation in landing height, or proportion of flies that fell

1733 through the column (fallen) were significant with a cluster of similarly expressed

1734 genes in a Weighted Gene Co-expression Network Analysis (WGCNA). Colored

1735 modules on the left represent WGCNA-generated clusters of genes and the color

1736 of each table cell corresponds with the magnitude of correlation coefficient (top

1737 number in cell). The bottom number in each cell is the significance of the

1738 correlation. No clusters were significantly correlated with any sex-phenotype

1739 combination.

1740

1741 **S1 Table.** *Drosophila* stocks used in this study.

1742 **S2 Table.** Raw and adjusted flight performance metrics.

1743 **S3 Table.** No significant correlations were observed between flight performance and  
1744 other DGRP phenotypes.

1745 **S4 Table.** Up to two inversions were significant covariates in three of the sex-based  
1746 analyses.

1747 **S5 Table.** Several additive variants associated with flight performance.

1748 **S6 Table.** Several candidate genes were validated for flight performance.

1749 **S7 Table.** Several gene-scores pass a Bonferroni threshold across all four sex-based  
1750 phenotypes.

1751 **S8 Table.** Twilight-estimated local False Discovery Rate (lFDR) cutoff thresholds for  
1752 PEGASUS\_flies gene-scores.

1753 **S9 Table.** Hierarchical HotNet sub-network gene annotations.

1754 **S10 Table.** Large sub-network from Hierarchical HotNet is enriched for trans-regulatory  
1755 factors and neurodevelopmental Gene Ontology terms.

1756 **S11 Table.** Collection of smaller sub-networks from Hierarchical HotNet are collectively  
1757 enriched for mRNA splicing and autophagy Gene Ontology terms.

1758 **S12 Table.** Significant marginal variants identified from MAginal ePlstasis Test  
1759 (MAPIT).

1760 **S13 Table.** Epistatic interactions play a large role in shaping the genetic architecture of  
1761 flight performance.

1762 **S14 Table.** Epistatic interactions with *pickpocket 23* (*ppk23*) are enriched in a Gene  
1763 Ontology (GO) term analysis from neurodevelopmental genes.

1764 **S15 Table.** Genes mapped to from epistatic interactions with *CG42671* are significantly  
1765 enriched for neurodevelopment in a Gene Ontology (GO) analysis.

1766 **S16 Table.** Gene set enrichment analysis for significant epistatic interactors within a  
1767 669 bp intergenic region between chr3L:6890373 - 6891042 suggests  
1768 enrichment for neurodevelopmental Gene Ontology categories.

1769 **S17 Table.** Master lookup table for all genes identified.

1770 **S18 Table.** Empirically derived P-values from simulated permutations of the genotype-  
1771 phenotype matrix.

1772

1773 **S1 File. High-speed gifs of strong, intermediate, and weak genotypes in flight**  
1774 **performance assay;** <https://doi.org/10.26300/dwvm-vt70>

1775 **S2 File. BEAGLE-imputed DGRP2 genome;** <https://doi.org/10.26300/317y-p682>

1776 **S3 File. All marginal P-value significance scores calculated using MAPIT;**

1777 <https://doi.org/10.26300/xcrh-c744>

1778 **S4 File. Source code for PEGASUS\_flies;** <https://doi.org/10.26300/qhc7-dp70> -- Also

1779 available at: [https://github.com/ramachandran-lab/PEGASUS\\_flies](https://github.com/ramachandran-lab/PEGASUS_flies)

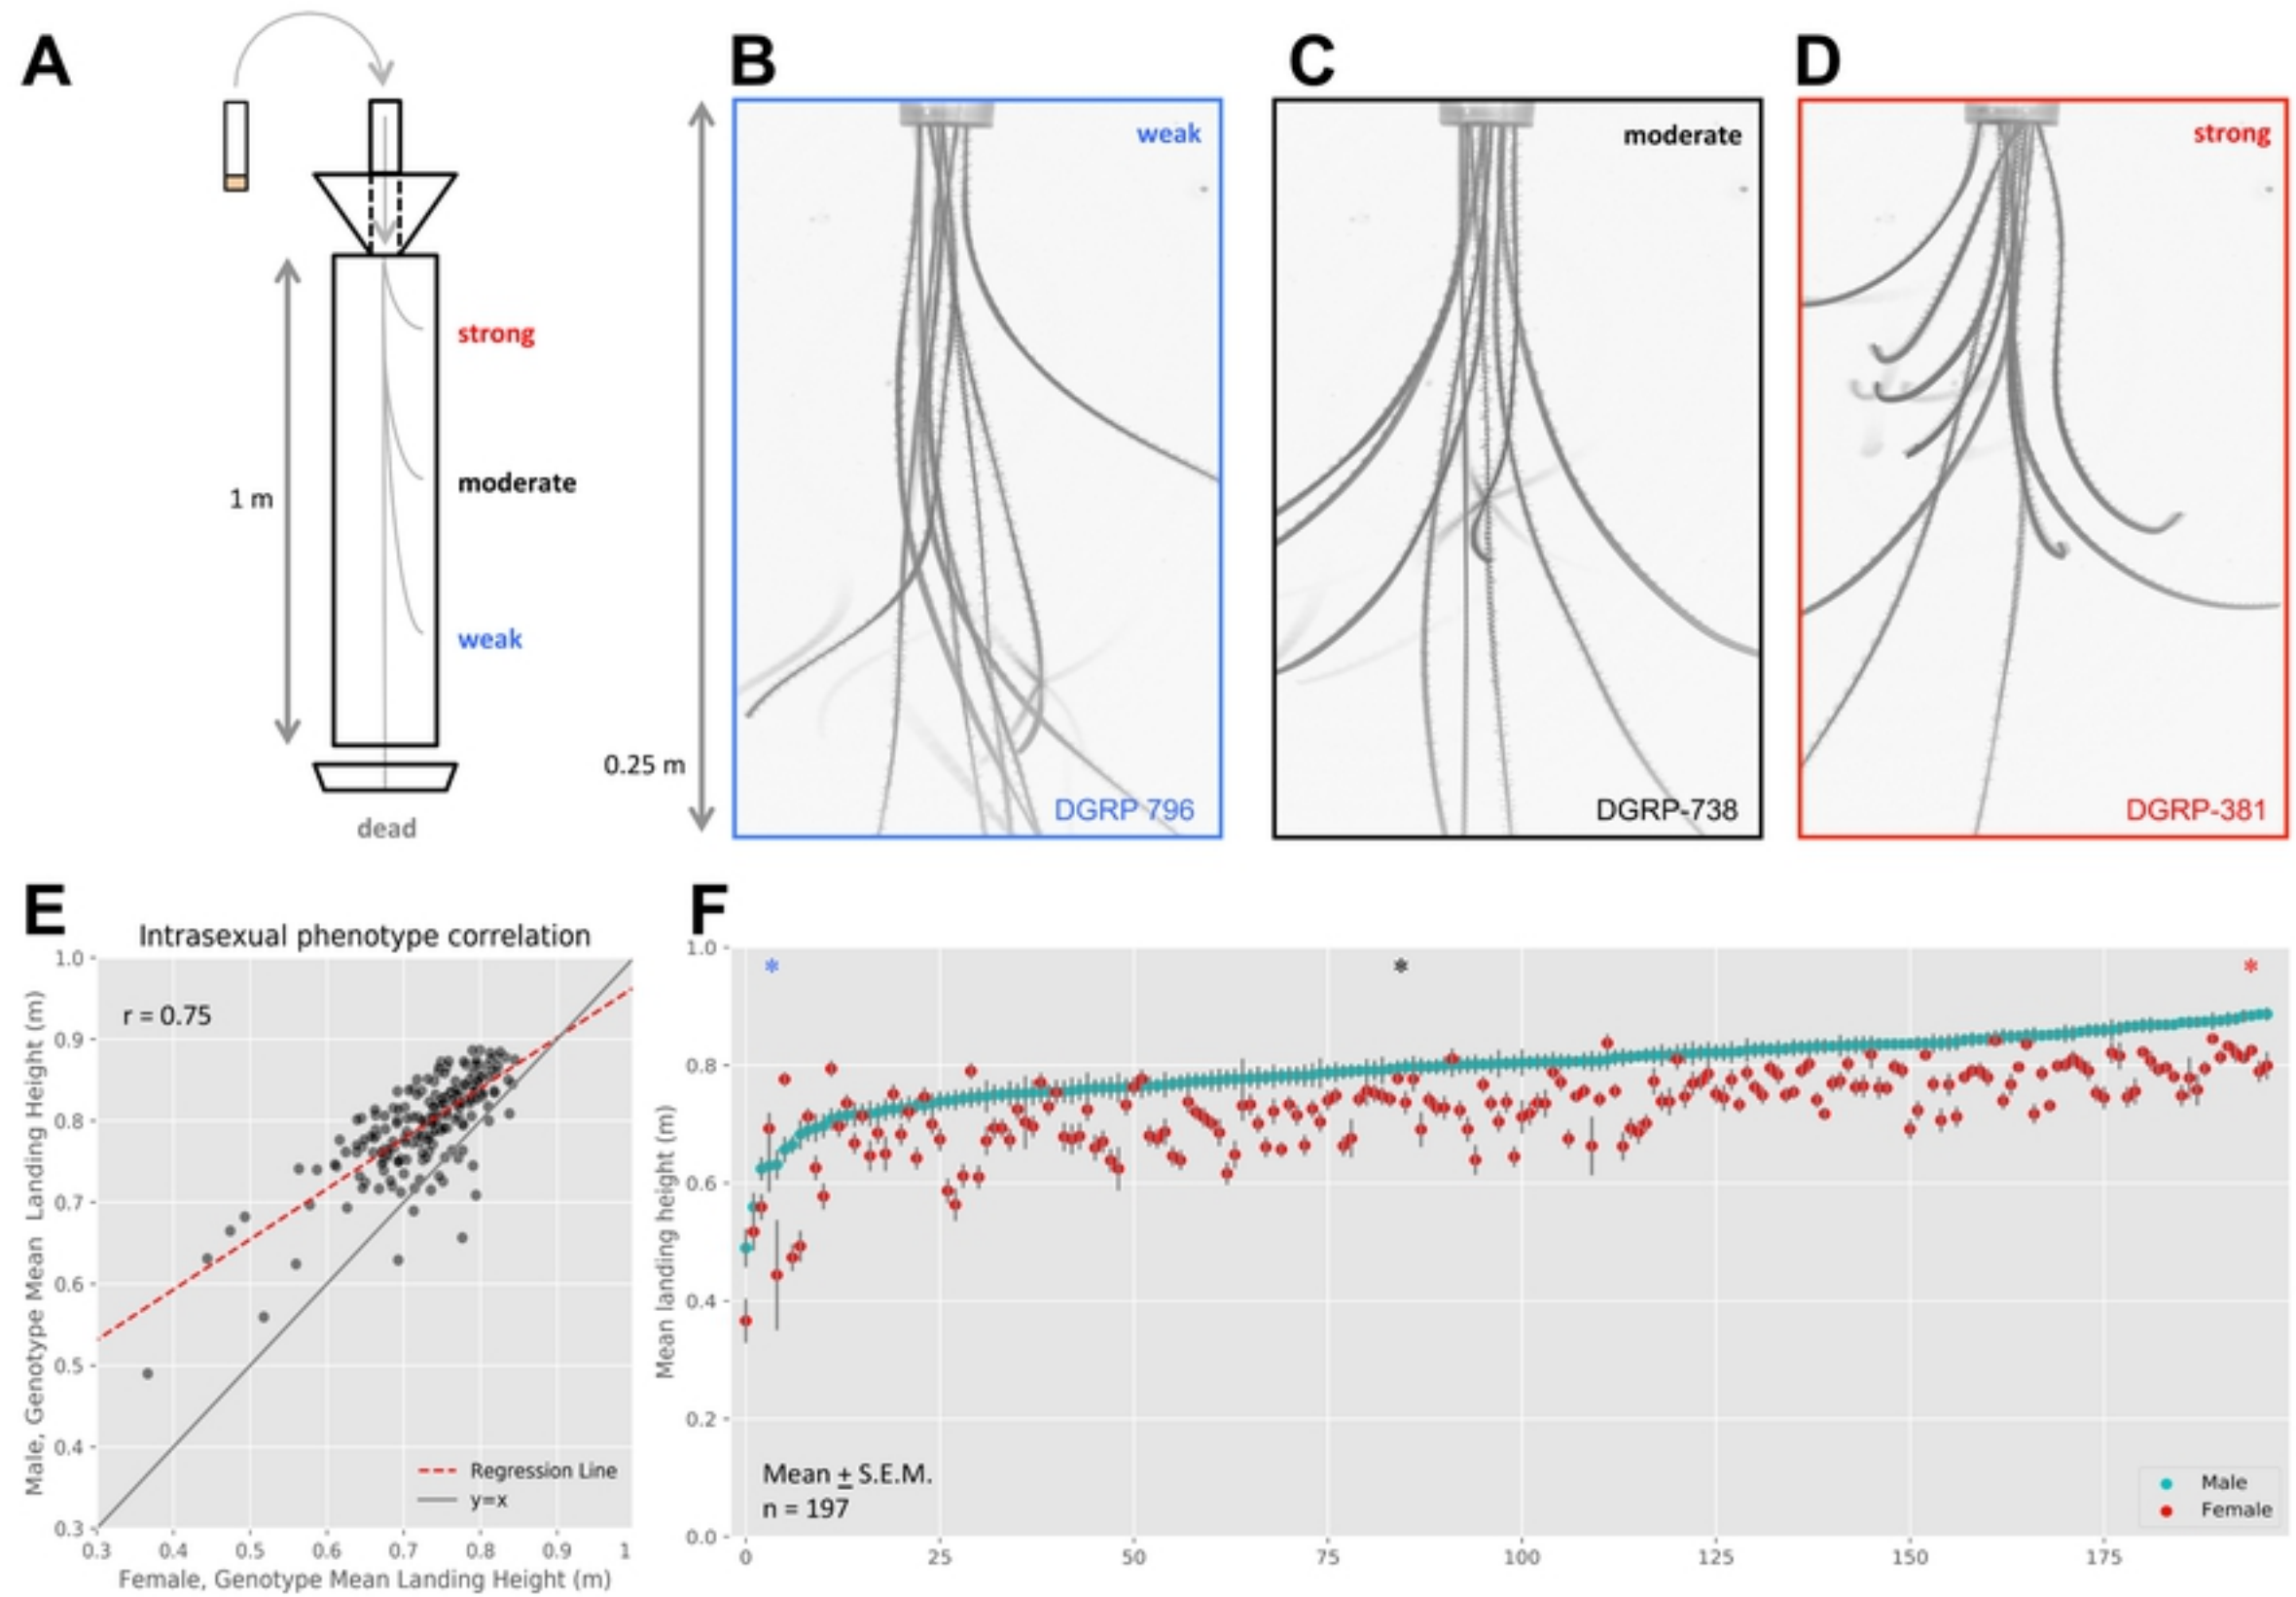

Figure 1

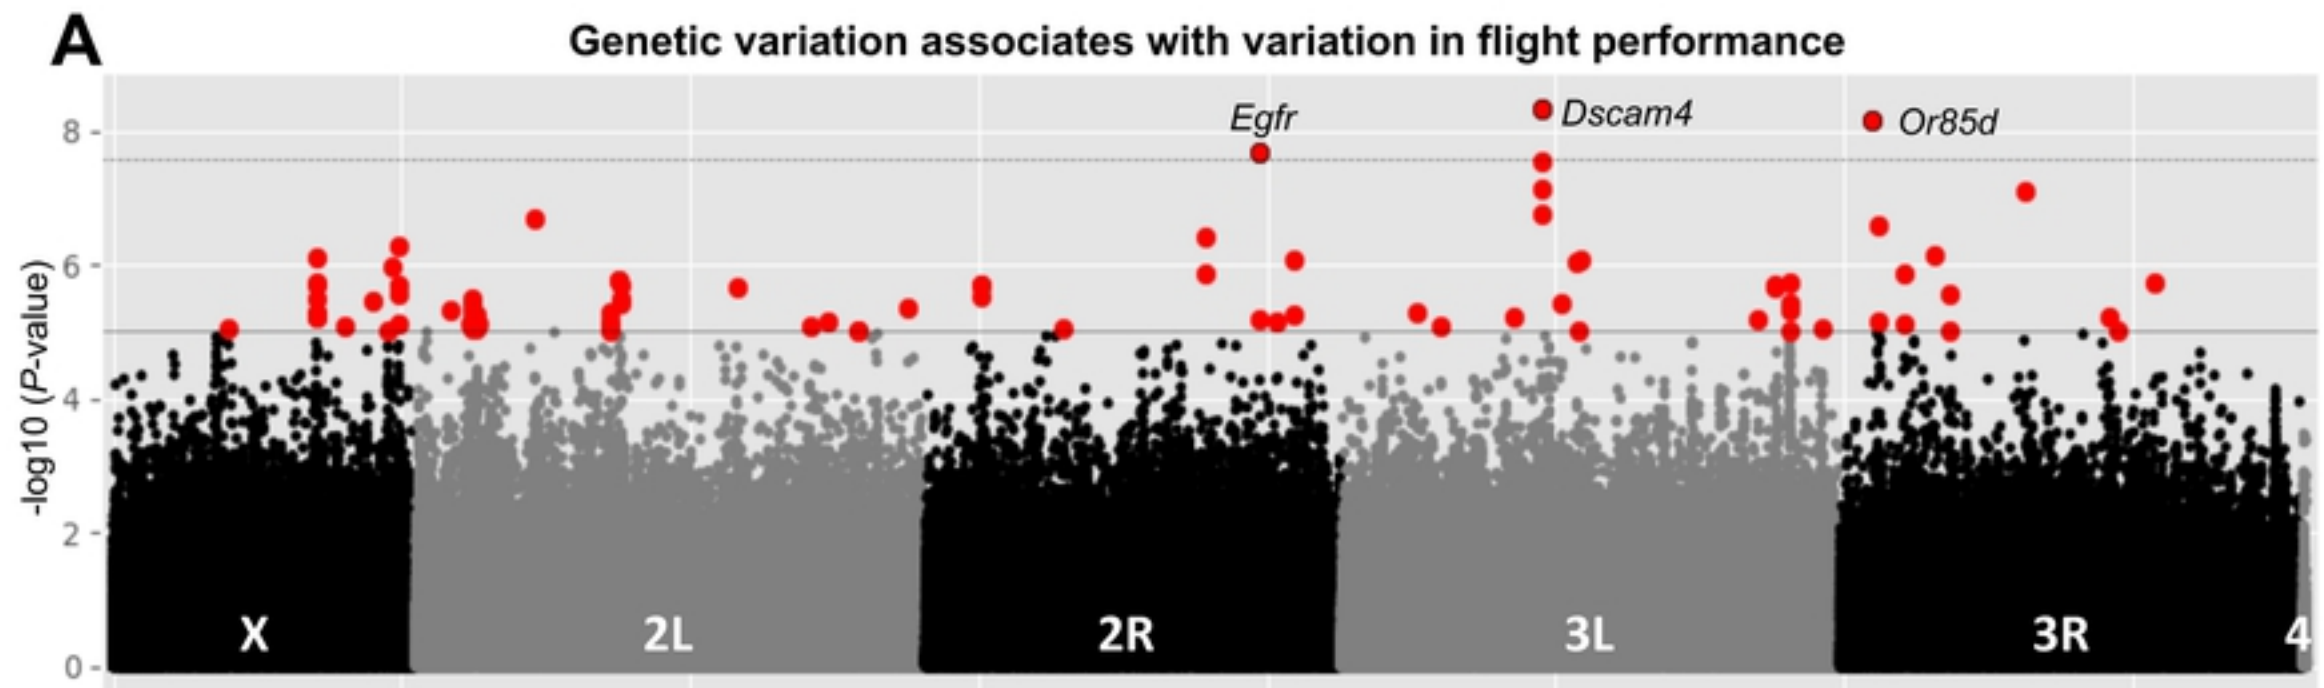

### B

Four-way Venn Diagram of Additive genes

■ Male  
■ Female  
■ Average  
■ Difference

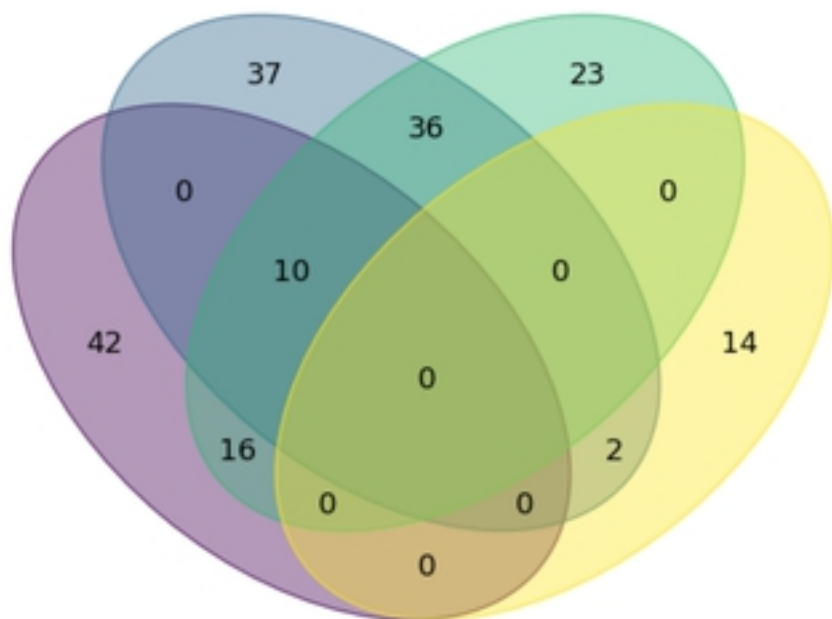

### C

Confirmation of several candidate genes

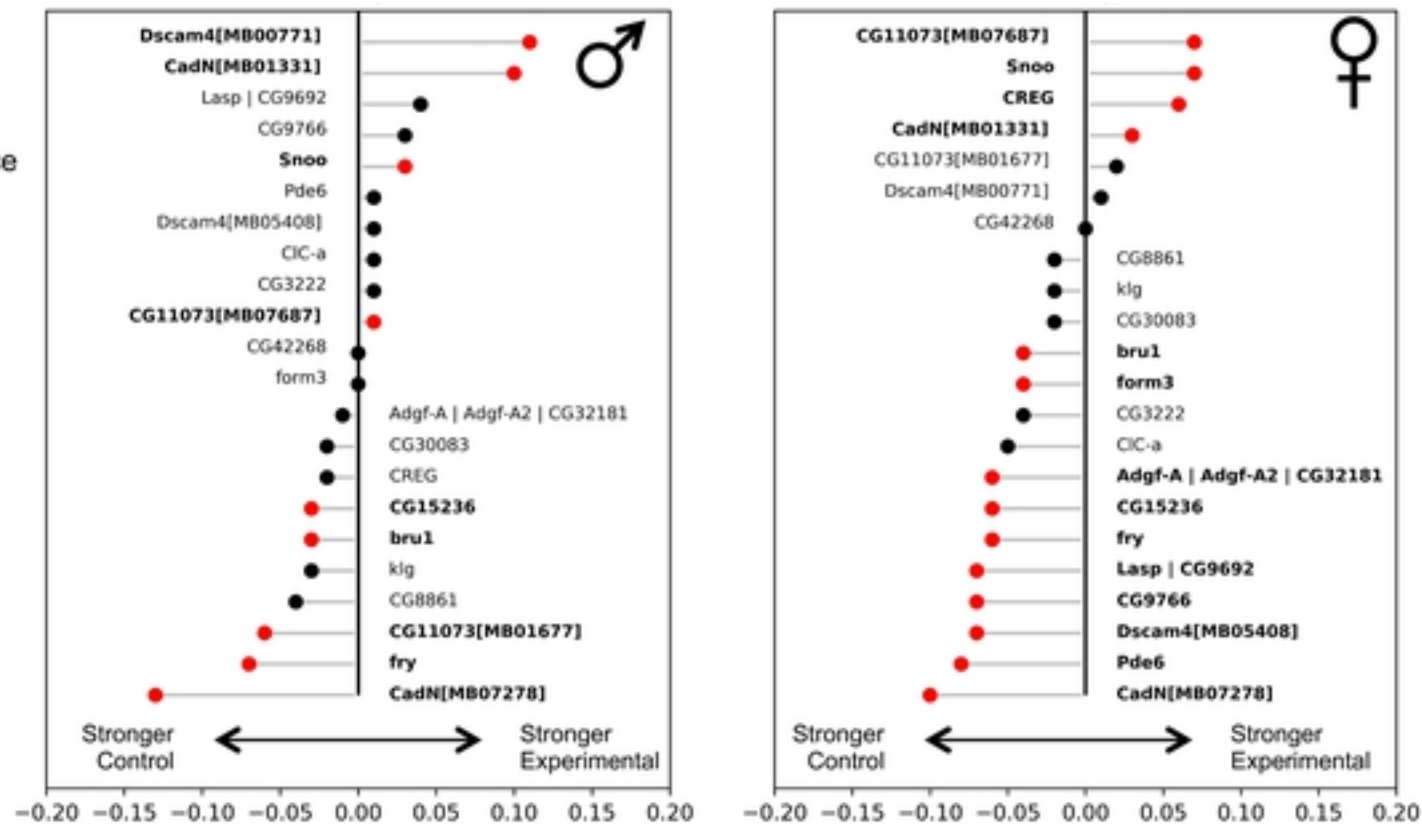

Figure 2



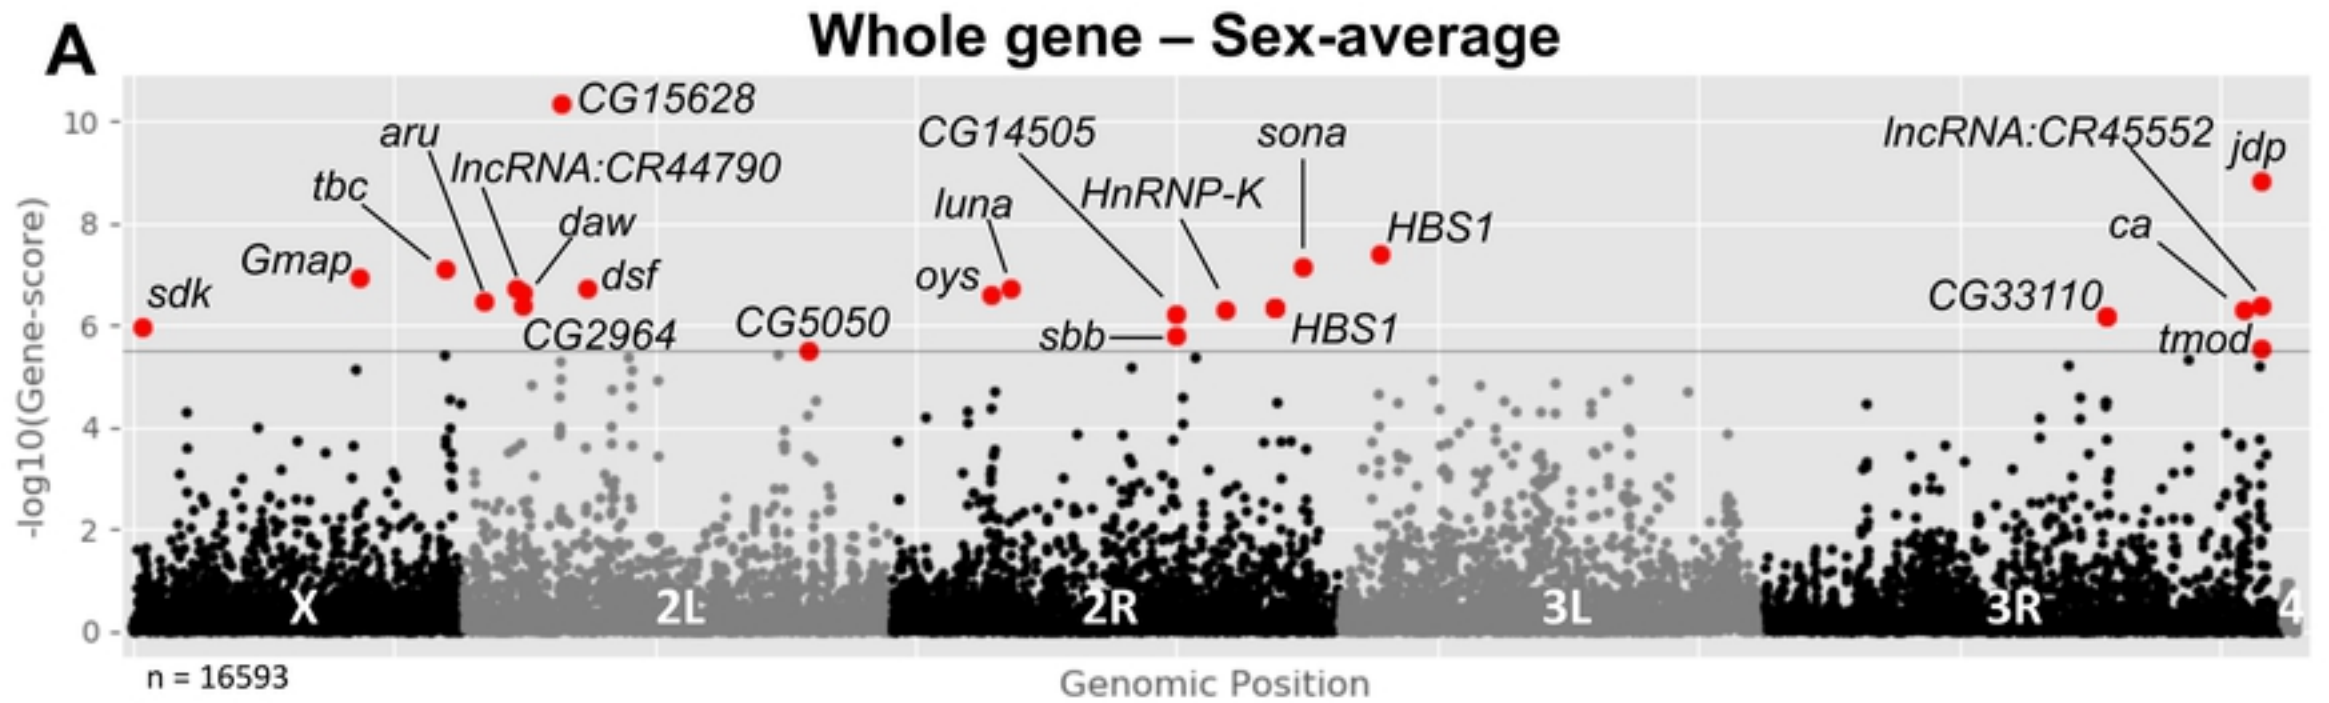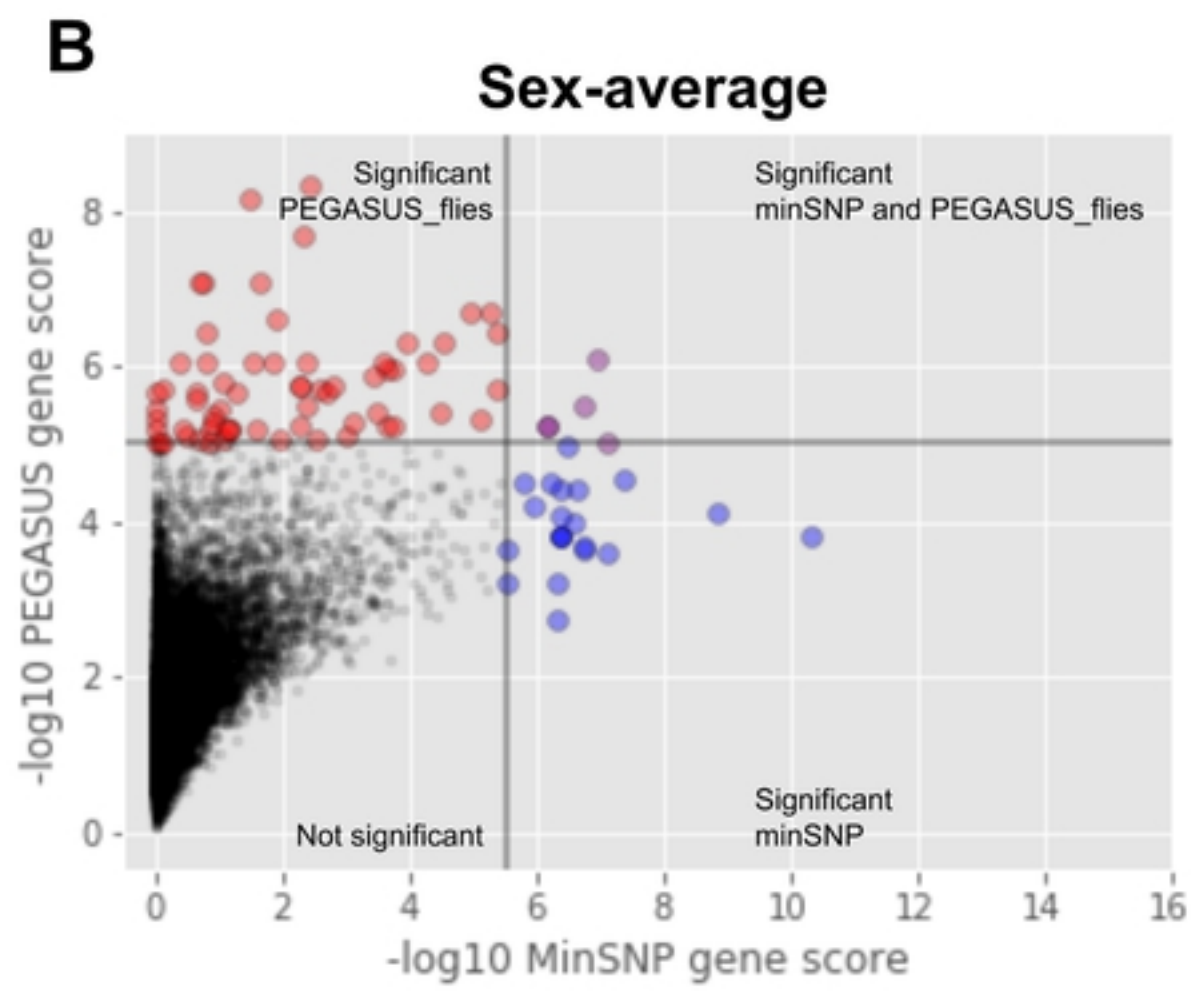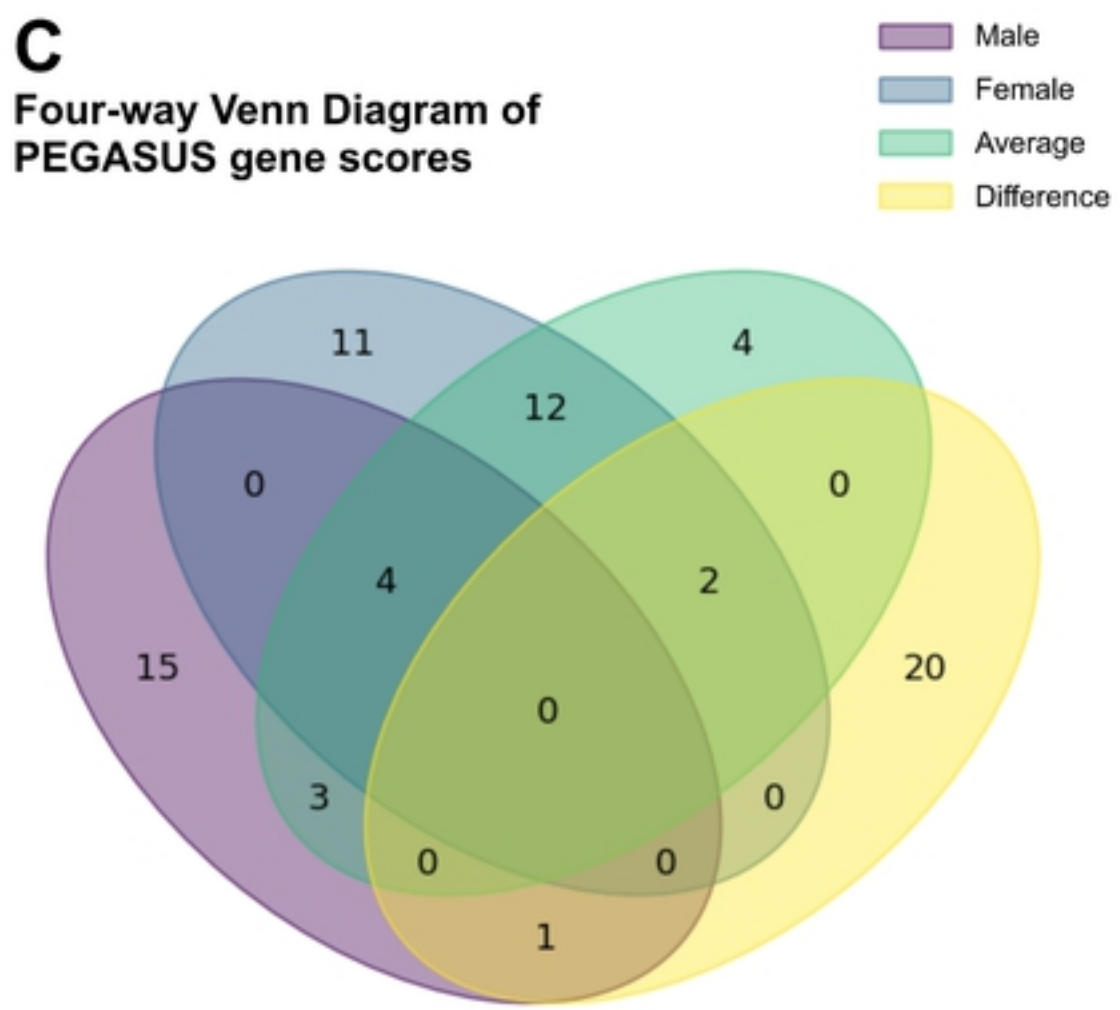

Figure 3

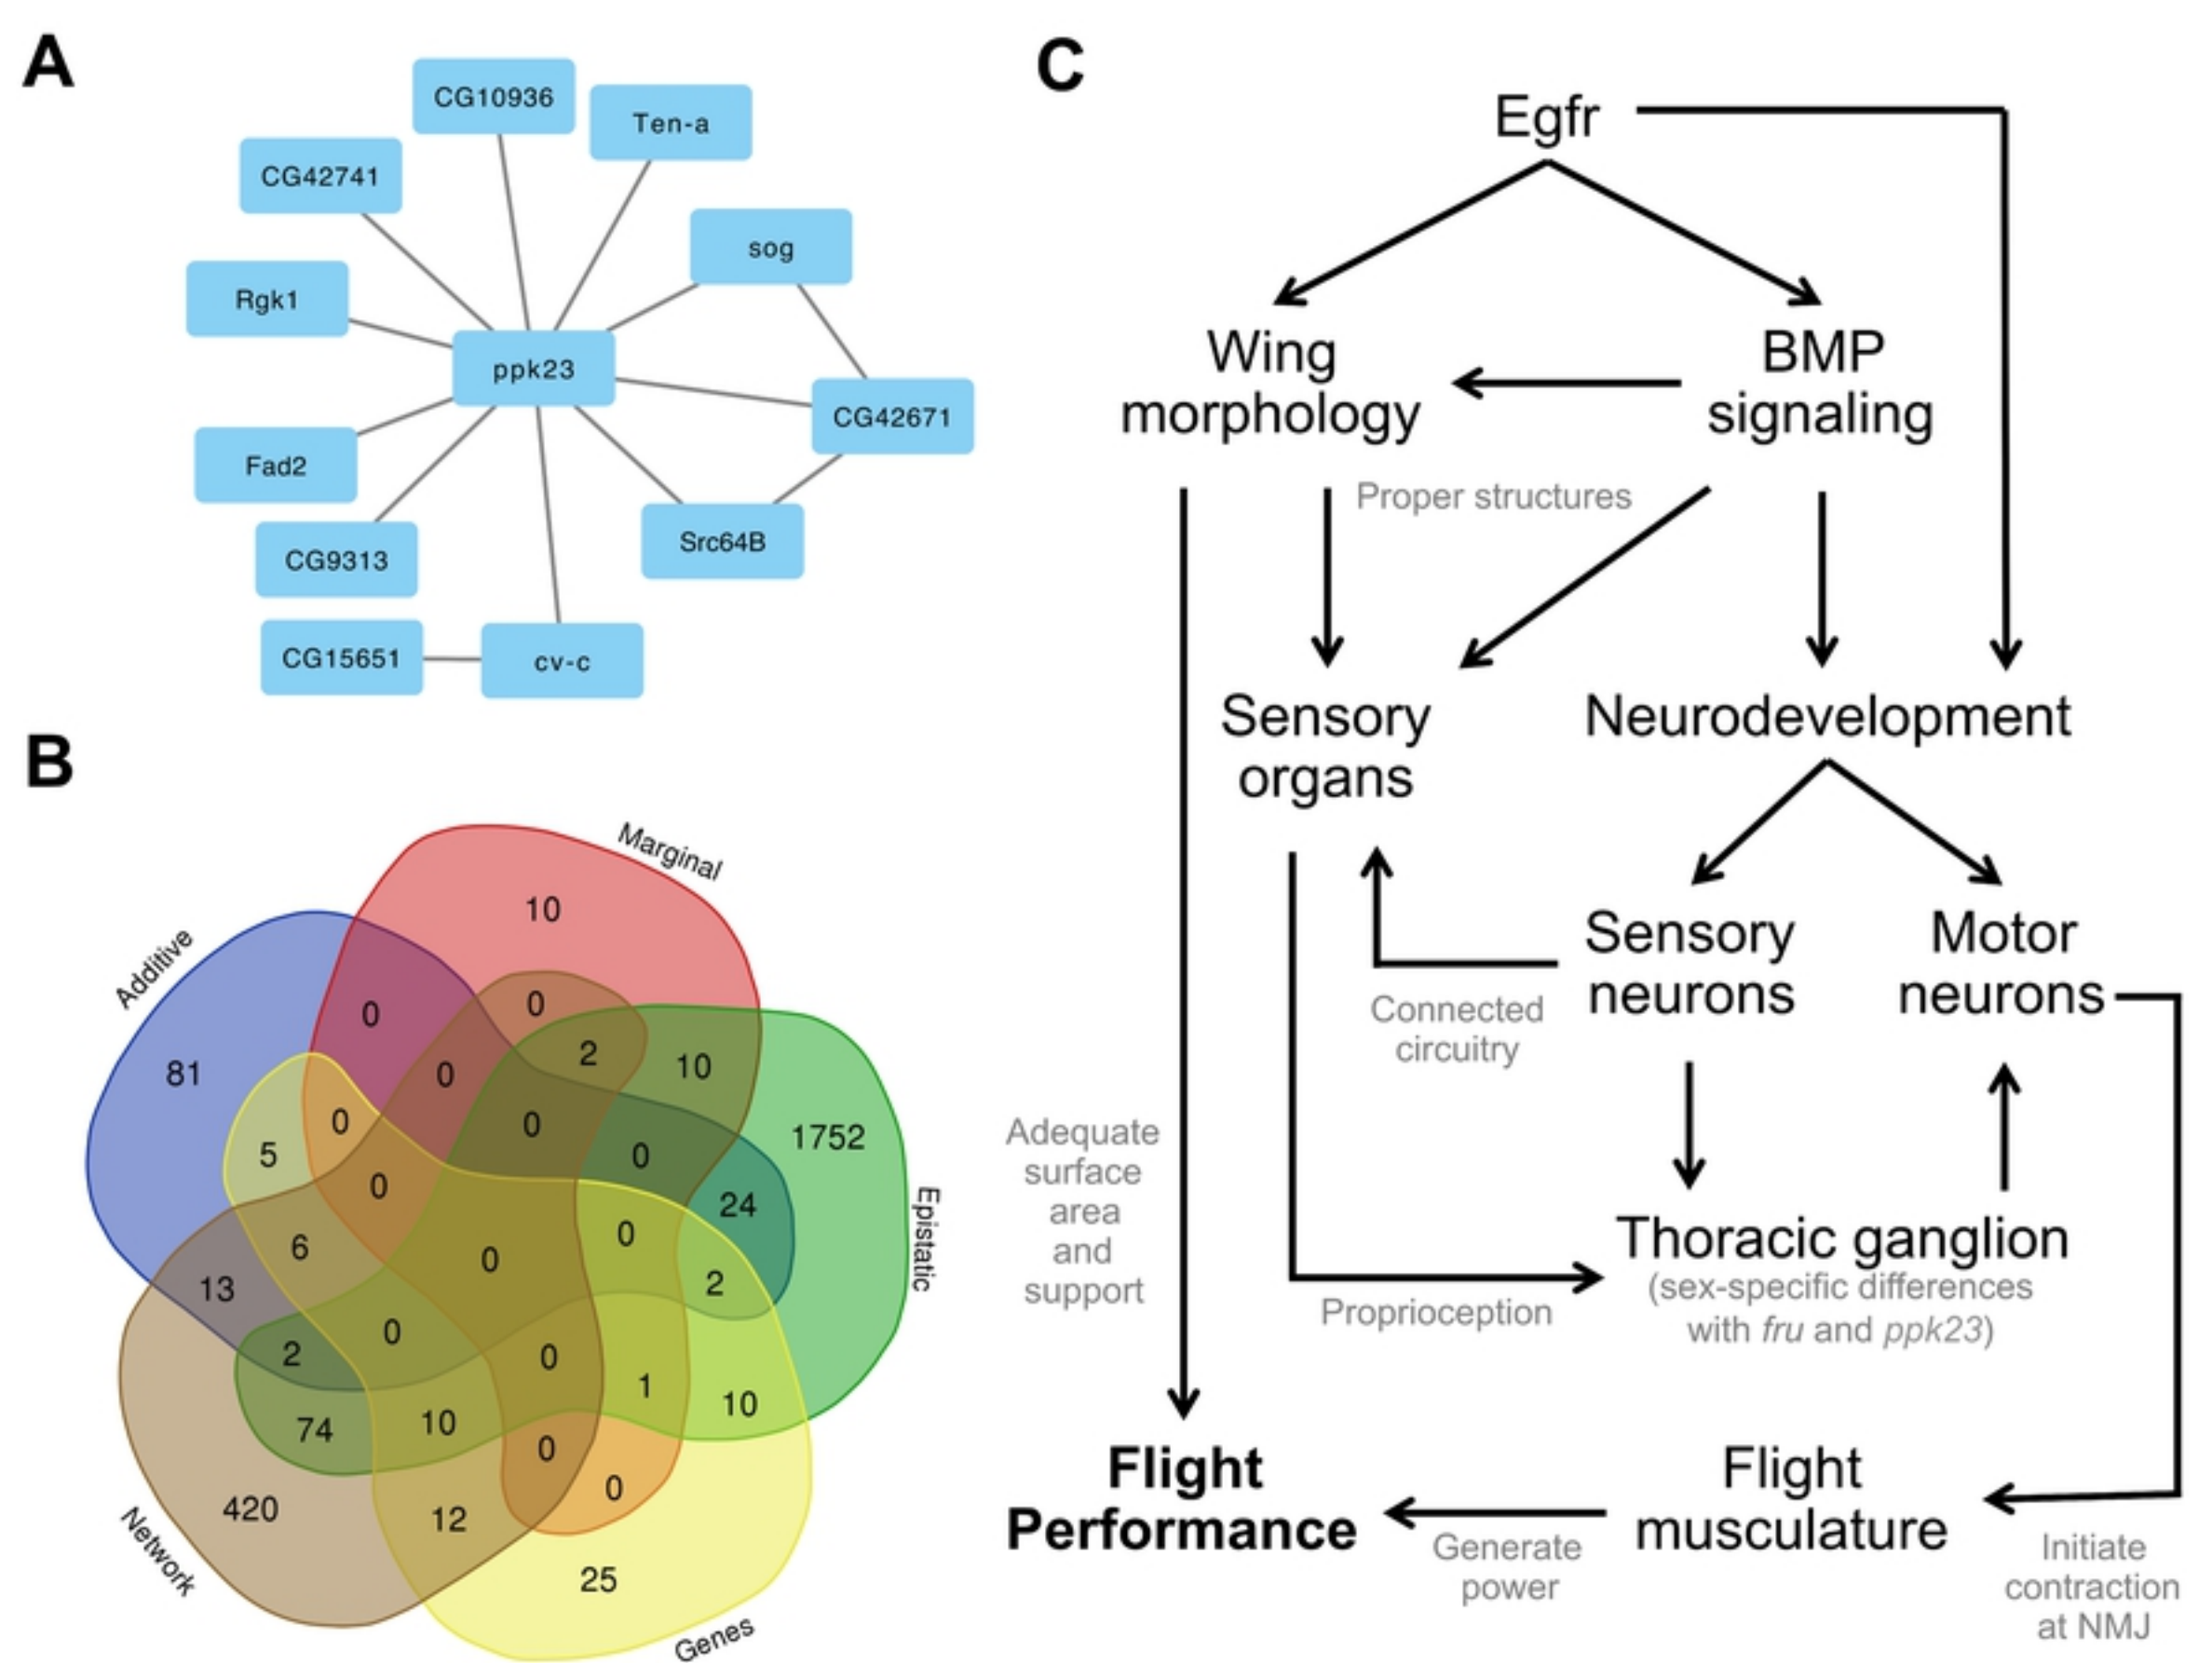

Figure 4
